# Supplementary material for: Synthetic enhancer design by in silico compensatory evolution reveals flexibility and constraint in cis-regulation
Source: PubMed Central journal article supplement (PMC5708098; doi:10.1186/s12918-017-0485-2), 2017-11-29
Supplement: 12918_2017_485_MOESM1_ESM.pdf [file 12918_2017_485_MOESM1_ESM.pdf]

# Contents

|          |                                            |          |
|----------|--------------------------------------------|----------|
| <b>1</b> | <b>Supplementary Materials</b>             | <b>2</b> |
| 1.1      | Supplementary Figures and Tables . . . . . | 2        |
| 1.2      | Position Weight Matrices Used . . . . .    | 20       |
| 1.3      | Sequences . . . . .                        | 21       |

## List of Figures

|     |                                                                    |    |
|-----|--------------------------------------------------------------------|----|
| S1  | Figure S1. Expression and prediction on path to e251. . . . .      | 4  |
| S2  | Figure S2. mRNA FISH of a reporter containing no enhancer. . . . . | 4  |
| S3  | Figure S3. Conservation of motifs in S2Es . . . . .                | 5  |
| S4  | Figure S4. Expression and prediction along a path to s272. . . . . | 7  |
| S5  | Figure S5. Binding sites for Bcd . . . . .                         | 8  |
| S6  | Figure S6. Binding sites for Cad . . . . .                         | 9  |
| S7  | Figure S7. Binding sites for Cic . . . . .                         | 10 |
| S8  | Figure S8. Binding sites for Dic . . . . .                         | 11 |
| S9  | Figure S9. Binding sites for Dst . . . . .                         | 12 |
| S10 | Figure S10. Binding sites for Gt . . . . .                         | 13 |
| S11 | Figure S11. Binding sites for Hb . . . . .                         | 14 |
| S12 | Figure S12. Binding sites for Kni . . . . .                        | 15 |
| S13 | Figure S13. Binding sites for Kr . . . . .                         | 16 |
| S14 | Figure S14. Binding sites for Tll . . . . .                        | 17 |
| S15 | Figure S15. Binding sites for Zld . . . . .                        | 18 |

## List of Tables

|    |                                     |    |
|----|-------------------------------------|----|
| S1 | Table S1. Model Parameters. . . . . | 20 |
|----|-------------------------------------|----|

# 1 Supplementary Materials

## 1.1 Supplementary Figures and Tables

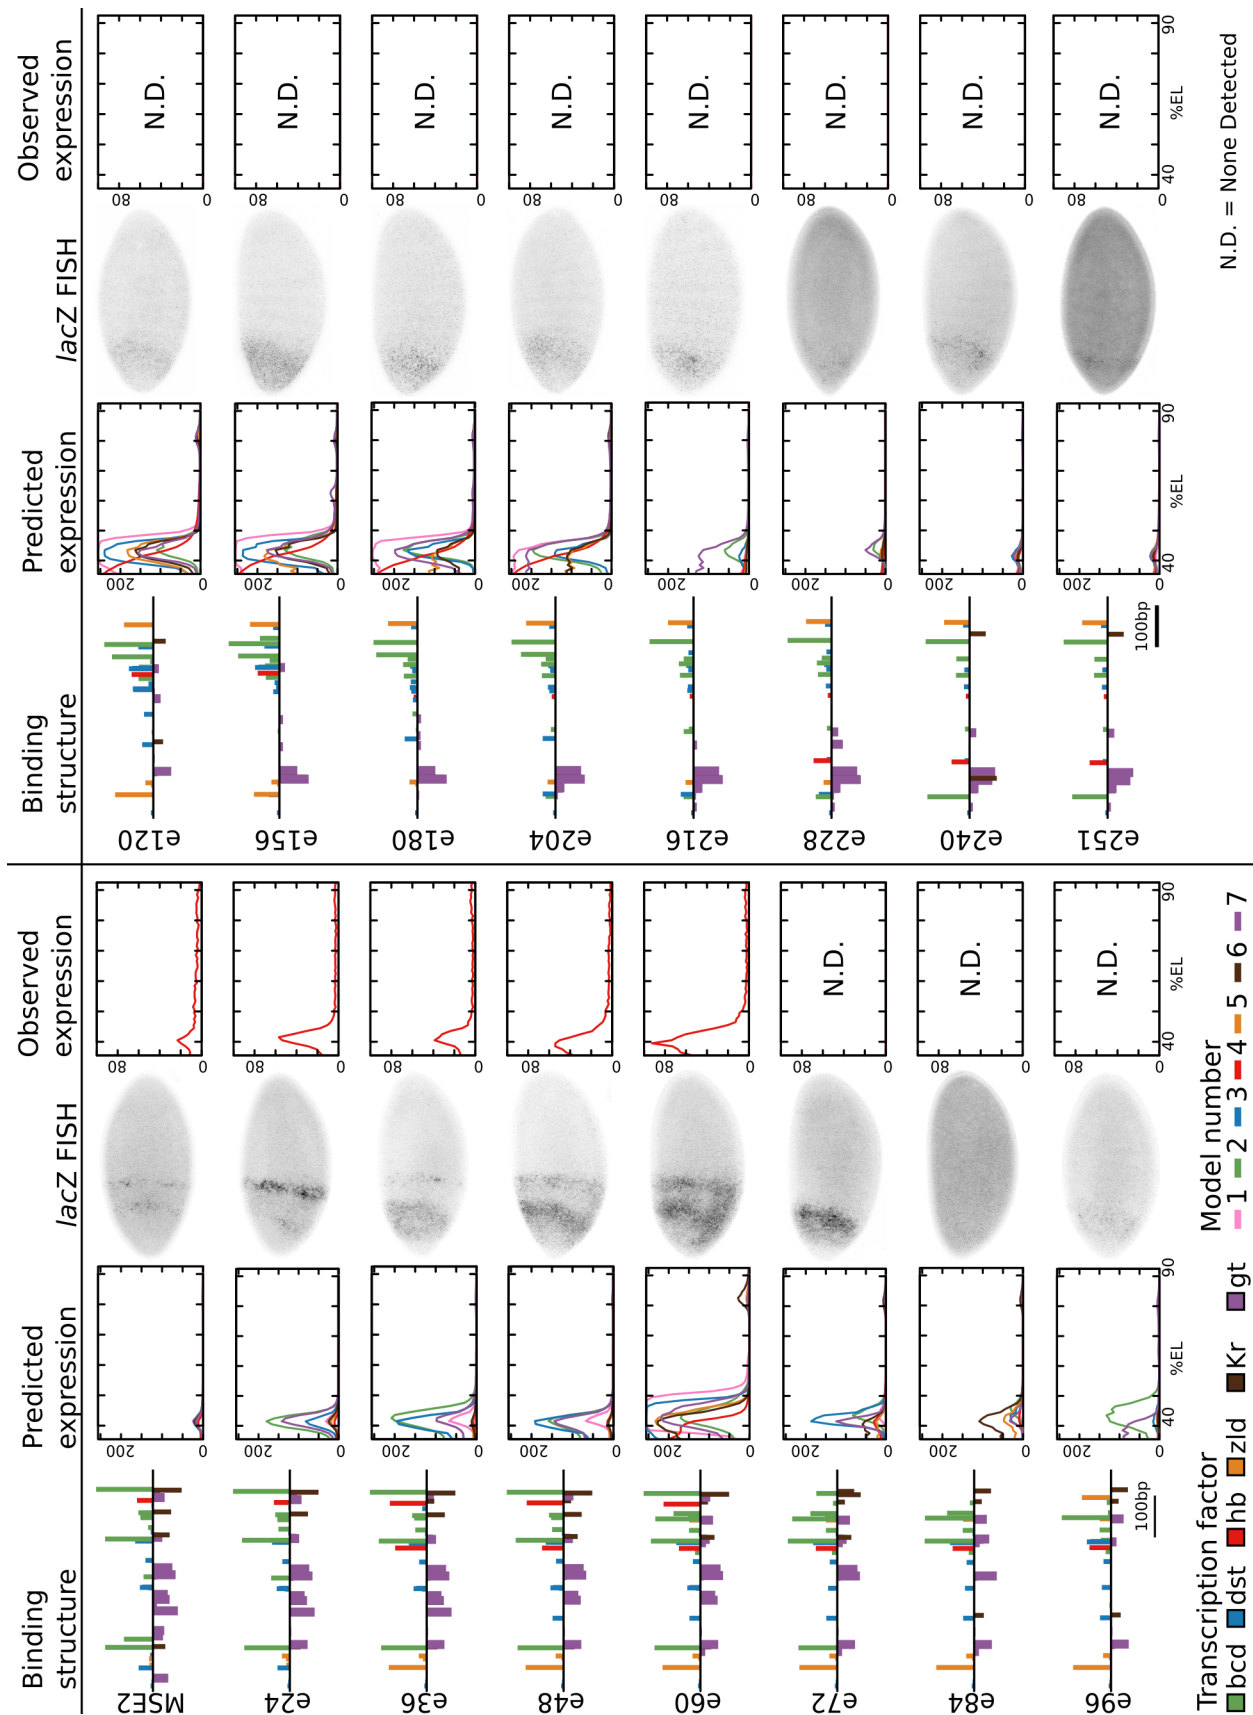

Figure S1. Continued on next page...

**Figure S1. Expression and prediction on path to e251.** Continued from previous page. For all tested enhancers the following are shown: (Column 1) Binding structure of tested enhancers. Activators are plotted on the positive  $y$ -axis and repressors on the negative. Bar height is proportional to the log-likelihood ratio of binding. (Column 2) The predicted output in each of 7 models used in the design of the sequences. (Column 3) The *lacZ* mRNA expression of a representative embryo. (Column 4) The quantitative level of mRNA expression for each line along a 10% DV stripe from 35.5% to 92.5% embryo length.

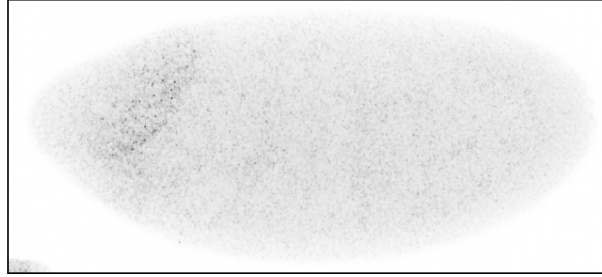

**Figure S2. mRNA FISH of a reporter containing no enhancer.** We generated a vector, as previously described, that contains no inserted putative enhancer and inserted the sequence into the *Attp2* landing site. The resulting construct drives weak expression of an ectopic stripe anterior to *eve* stripe 1, confirming that this expression pattern is driven, at least in part, by sequences present on the vector.

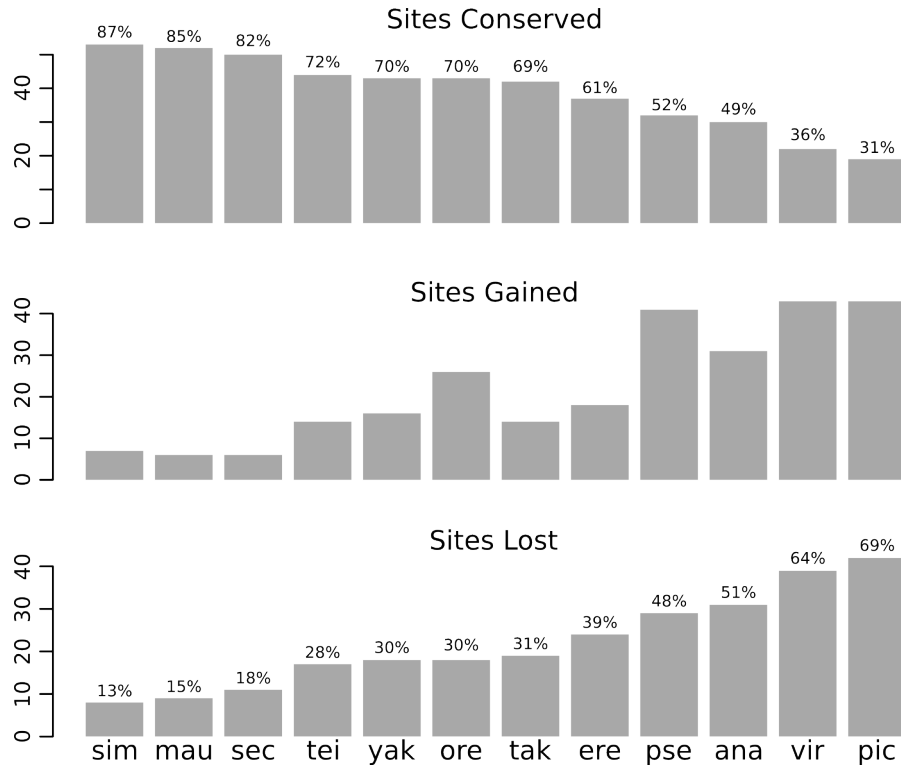

**Figure S3. Conservation of motifs in S2Es.** (Top) The number of binding motifs at LLR greater than 0 for the factors Bcd, hb, Kr, and gt that are conserved with S2E are shown for each putative S2E. The percent conservation is given above each bar. (Middle) The number of binding motifs (LLR>0) for the same 4 factors that are gained are shown for each putative S2E. (Bottom) The number of motifs (LLR>0) for the 4 factors that are lost are shown for each factor. The percent of sites lost is given above each bar. The sequences of each are reported in Kim et. al.[? ].

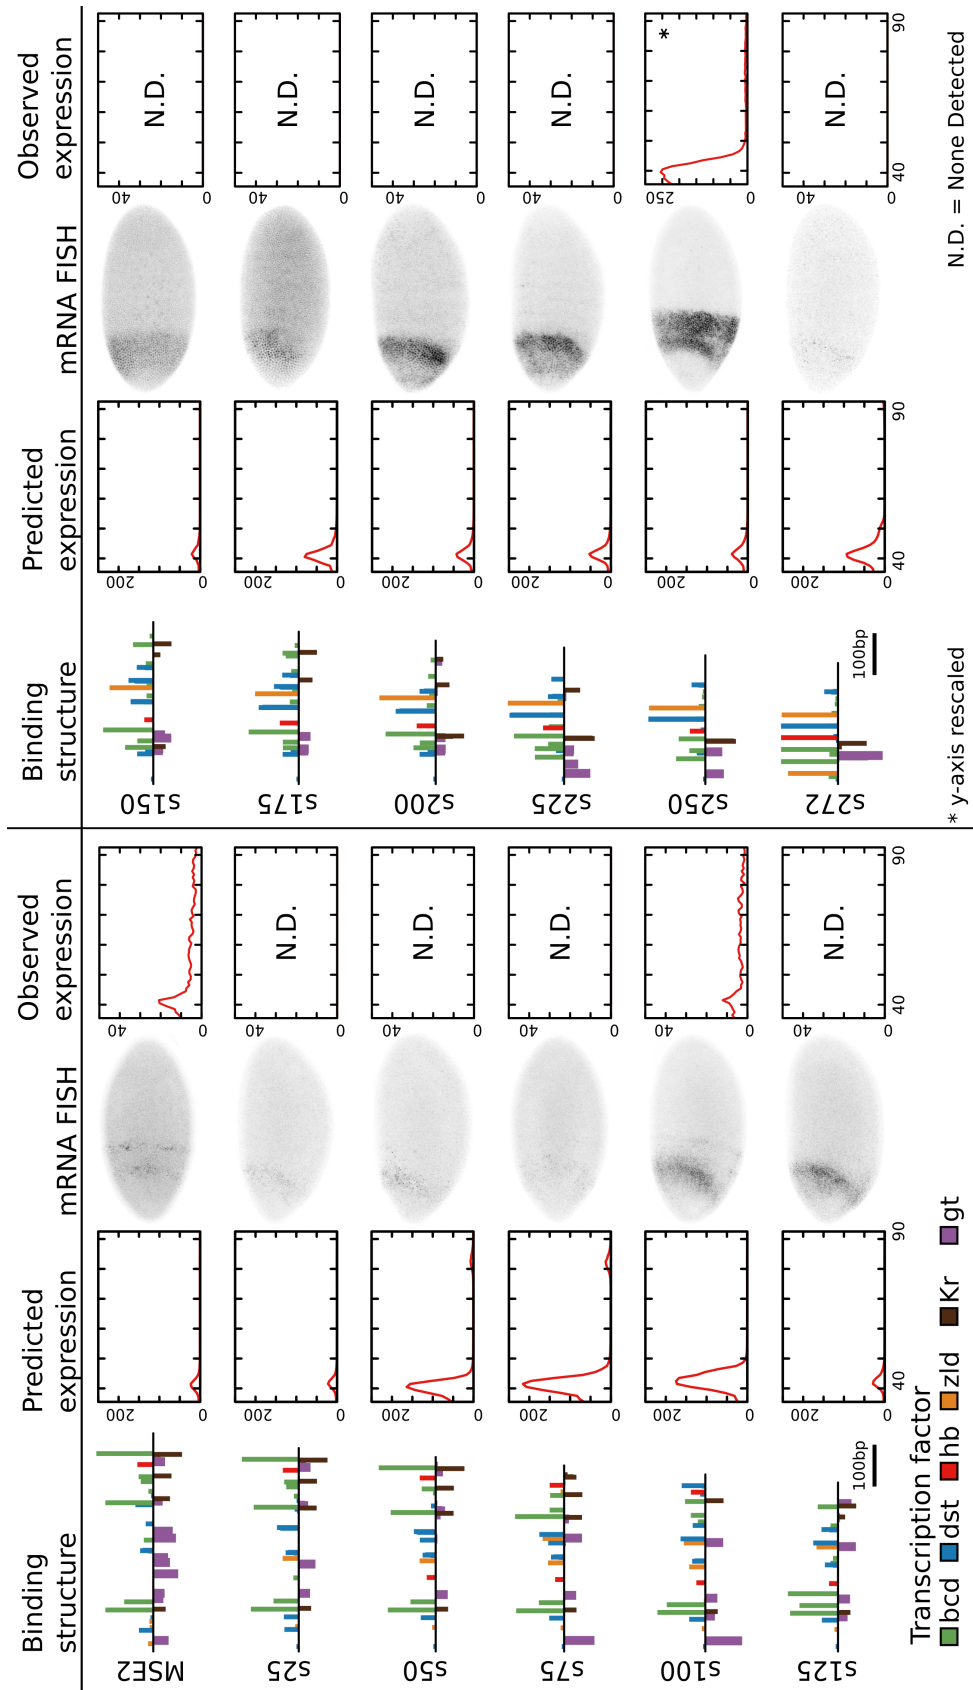

Figure S4. Continued on next page...

**Figure S4. Expression and prediction along a path to s272.** Continued from previous page. For all tested enhancers the following are shown: (Column 1) Binding structure of tested enhancers. Activators are plotted on the positive  $y$ -axis and repressors on the negative. Bar height is proportional to the log-likelihood ratio of binding. (Column 2) The predicted output in the model used in the design of the sequences. (Column 3) The *lacZ* mRNA expression of a representative embryo. (Column 4) The quantitative level of mRNA expression for each line along a 10% DV stripe from 35.5% to 92.5% embryo length.

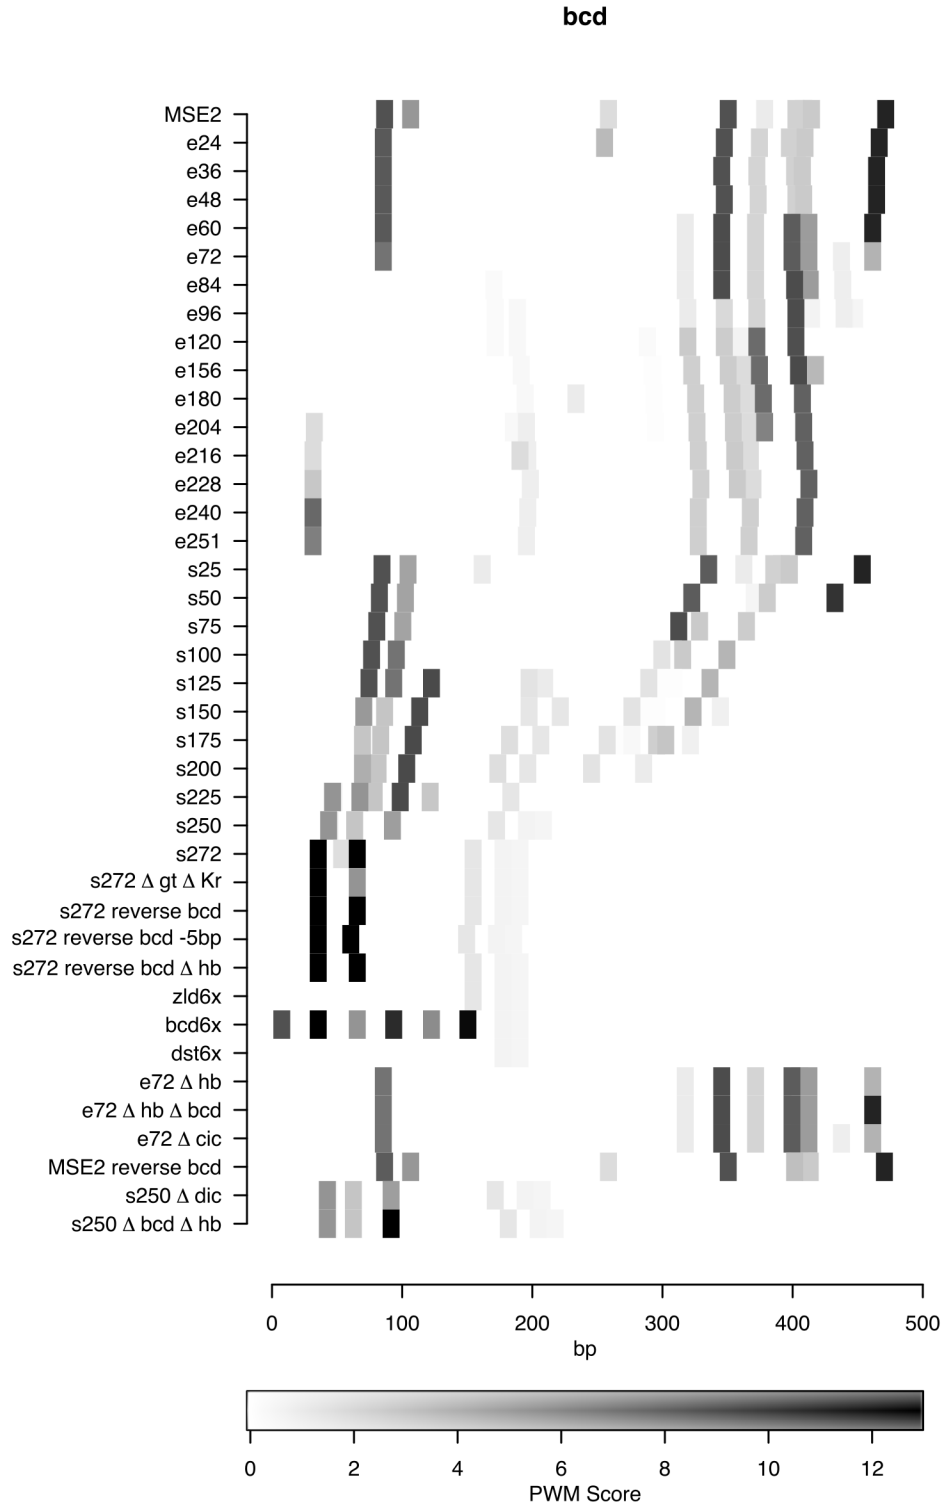

**Figure S5. Binding sites for Bcd** For each sequence used in this work, we calculated the Bcd PWM score at each position. Motif matches (score>0) are indicated by rectangles that are shaded according to the PWM score, with the legend under the *x*-axis.



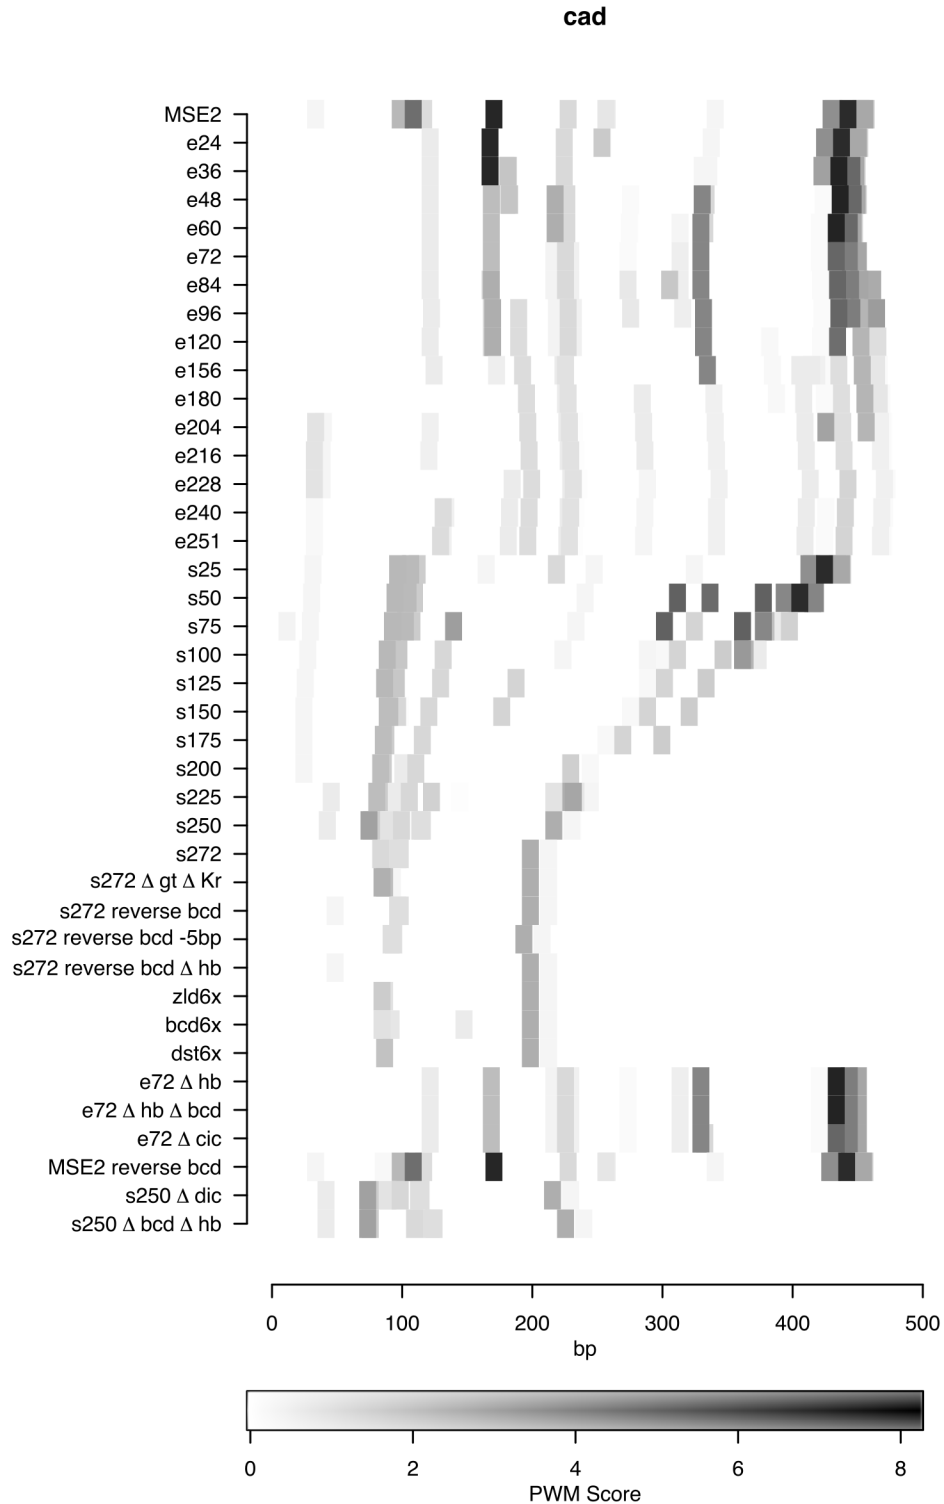

**Figure S6. Binding sites for Cad** For each sequence used in this work, we calculated the Cad PWM score at each position. Motif matches (score>0) are indicated by rectangles that are shaded according to the PWM score, with the legend under the *x*-axis.

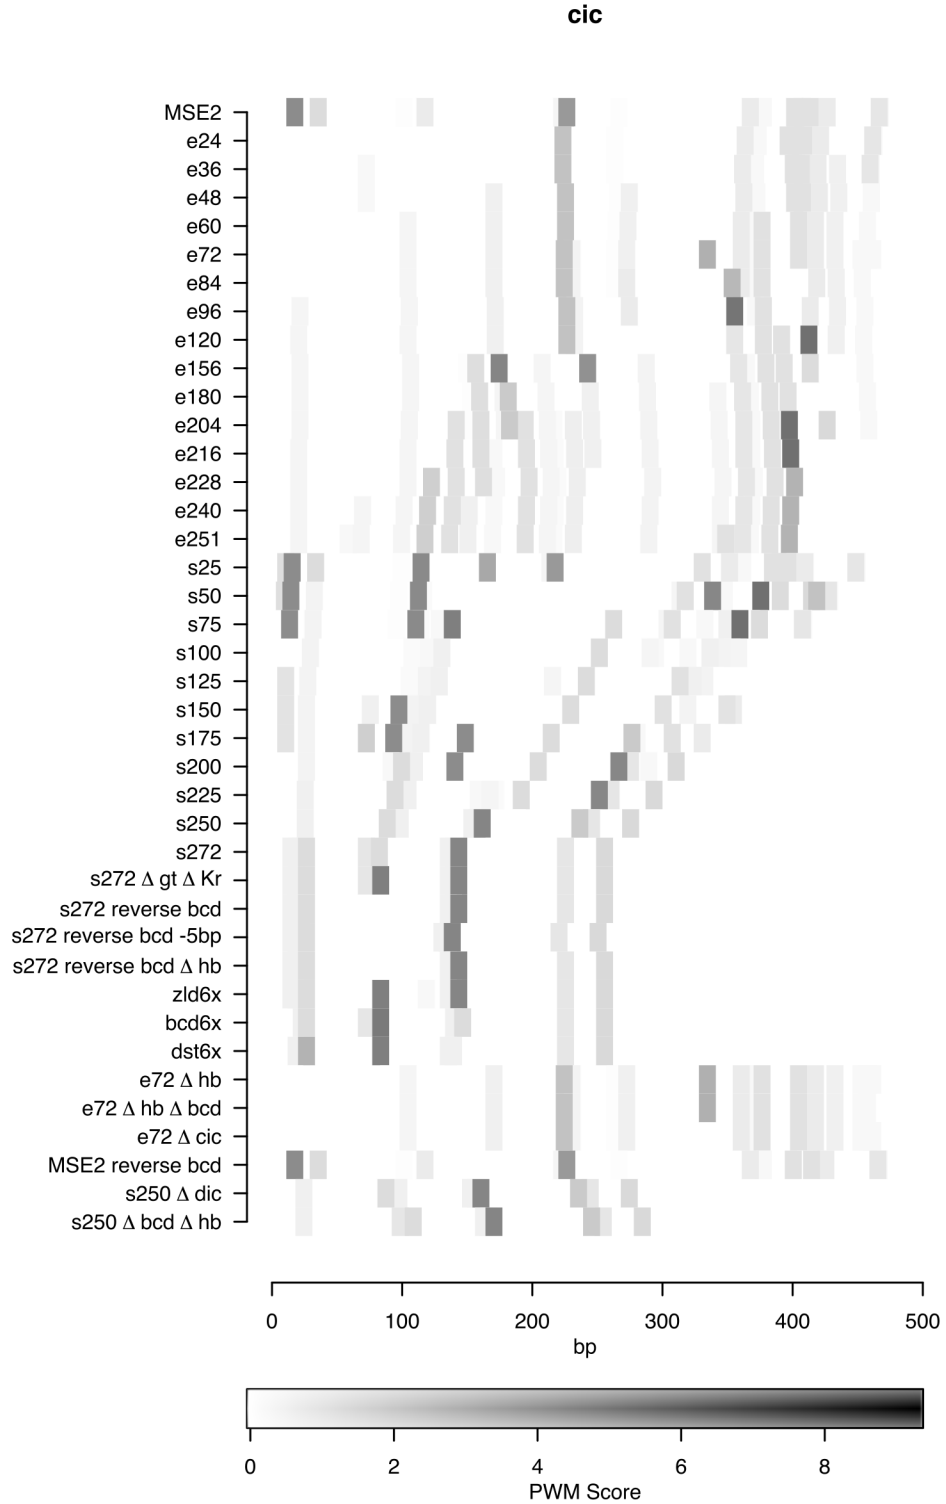

**Figure S7. Binding sites for Cic** For each sequence used in this work, we calculated the Cic PWM score at each position. Motif matches (score>0) are indicated by rectangles that are shaded according to the PWM score, with the legend under the *x*-axis.

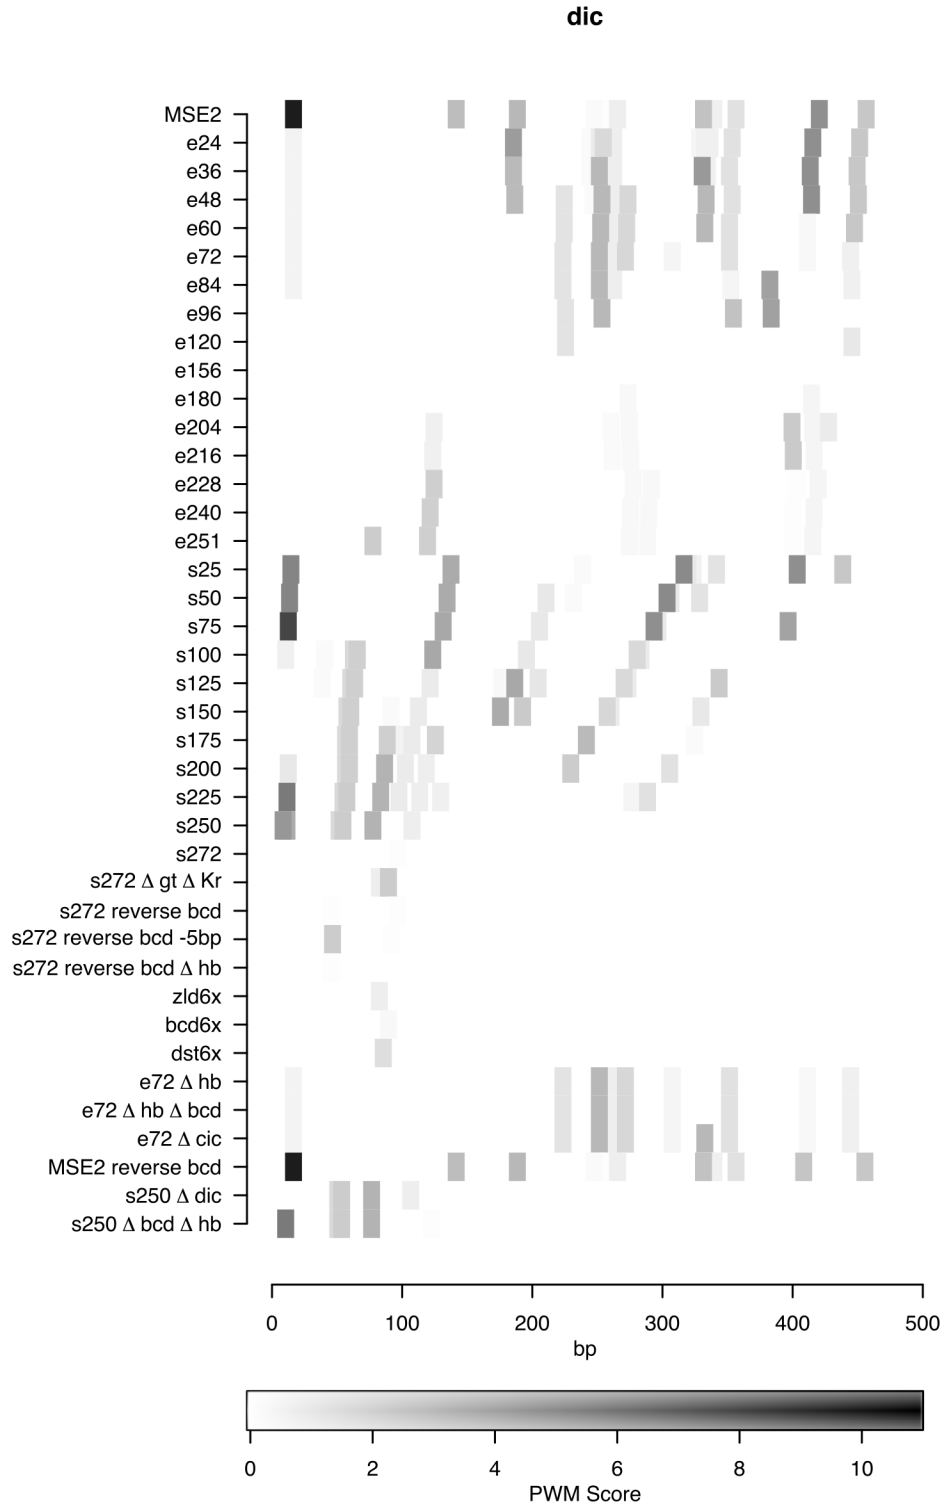

**Figure S8. Binding sites for Dic** For each sequence used in this work, we calculated the Dic PWM score at each position. Motif matches (score>0) are indicated by rectangles that are shaded according to the PWM score, with the legend under the *x*-axis.

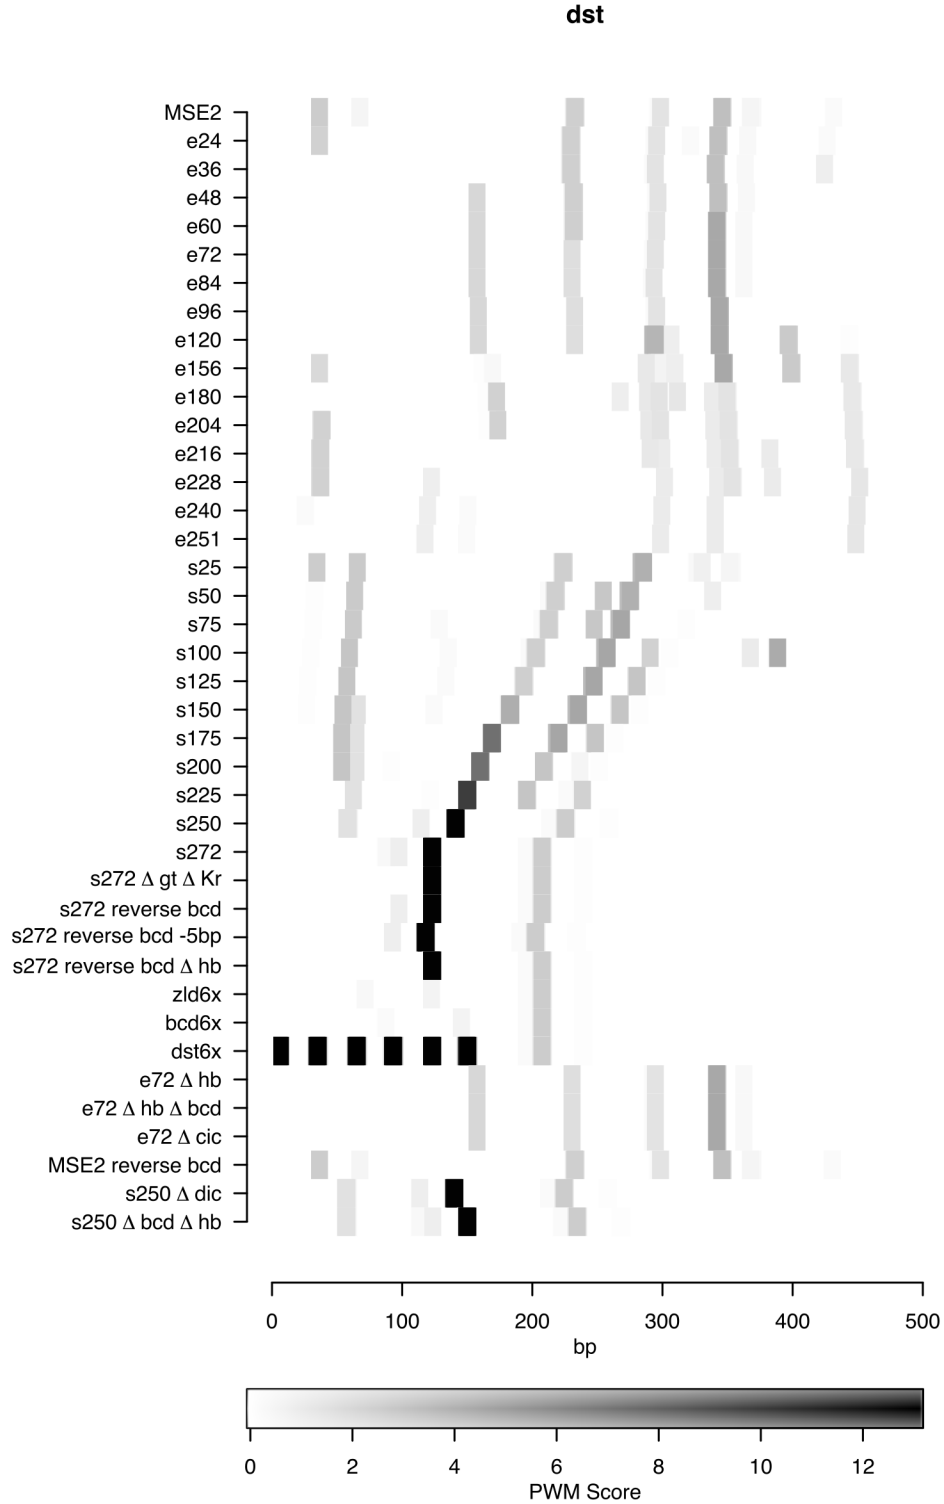

**Figure S9. Binding sites for Dst** For each sequence used in this work, we calculated the Dst PWM score at each position. Motif matches (score>0) are indicated by rectangles that are shaded according to the PWM score, with the legend under the *x*-axis.

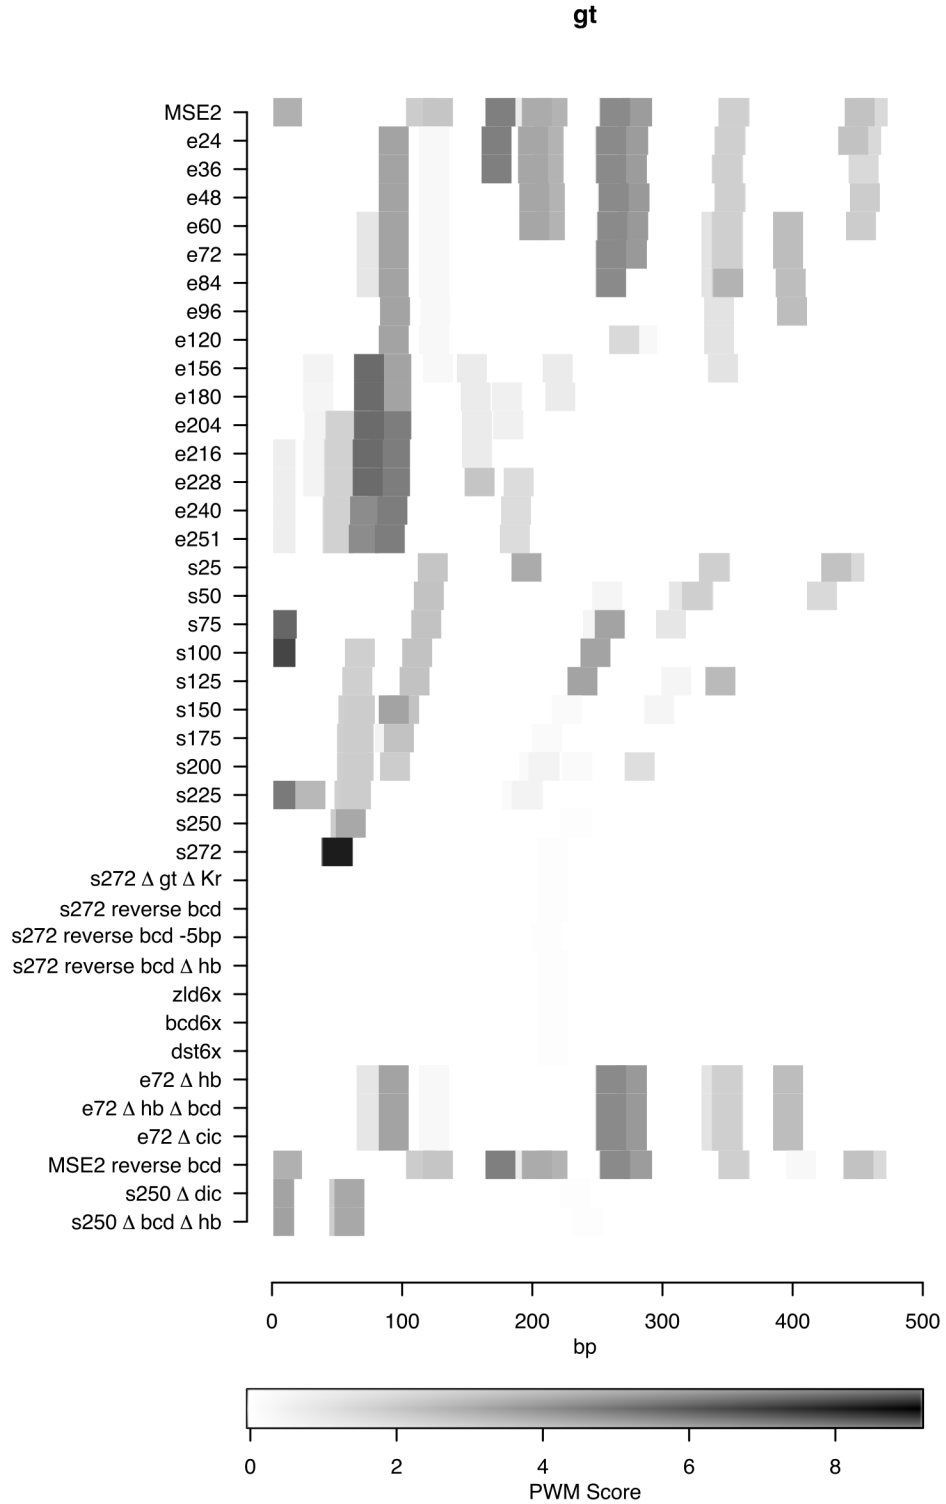

**Figure S10. Binding sites for Gt** For each sequence used in this work, we calculated the Gt PWM score at each position. Motif matches (score>0) are indicated by rectangles that are shaded according to the PWM score, with the legend under the *x*-axis.

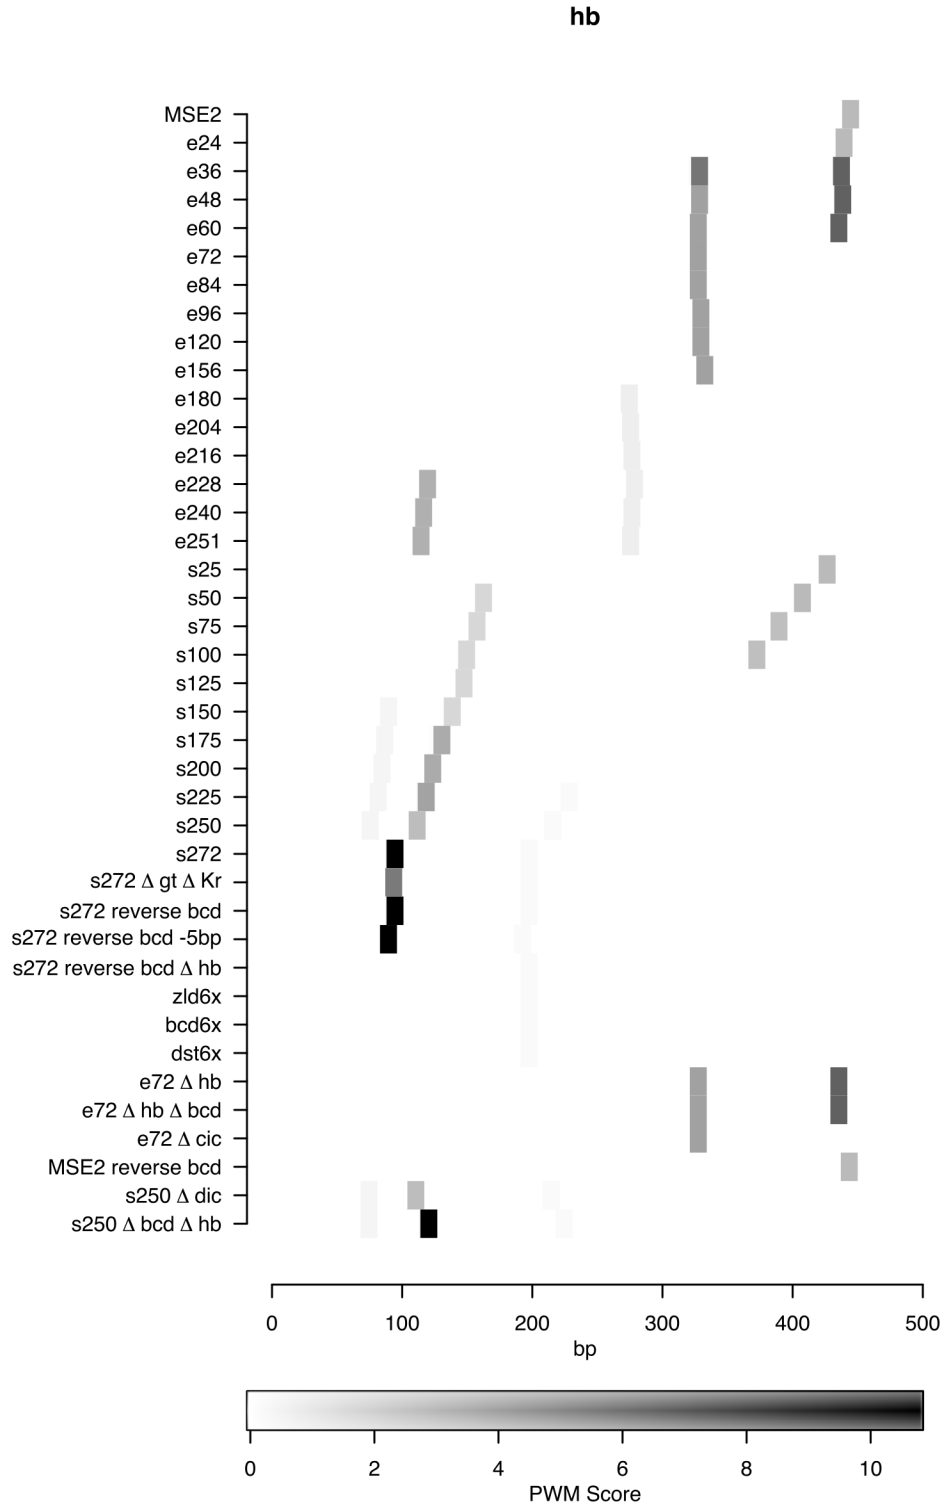

**Figure S11. Binding sites for Hb** For each sequence used in this work, we calculated the Hb PWM score at each position. Motif matches (score>0) are indicated by rectangles that are shaded according to the PWM score, with the legend under the *x*-axis.

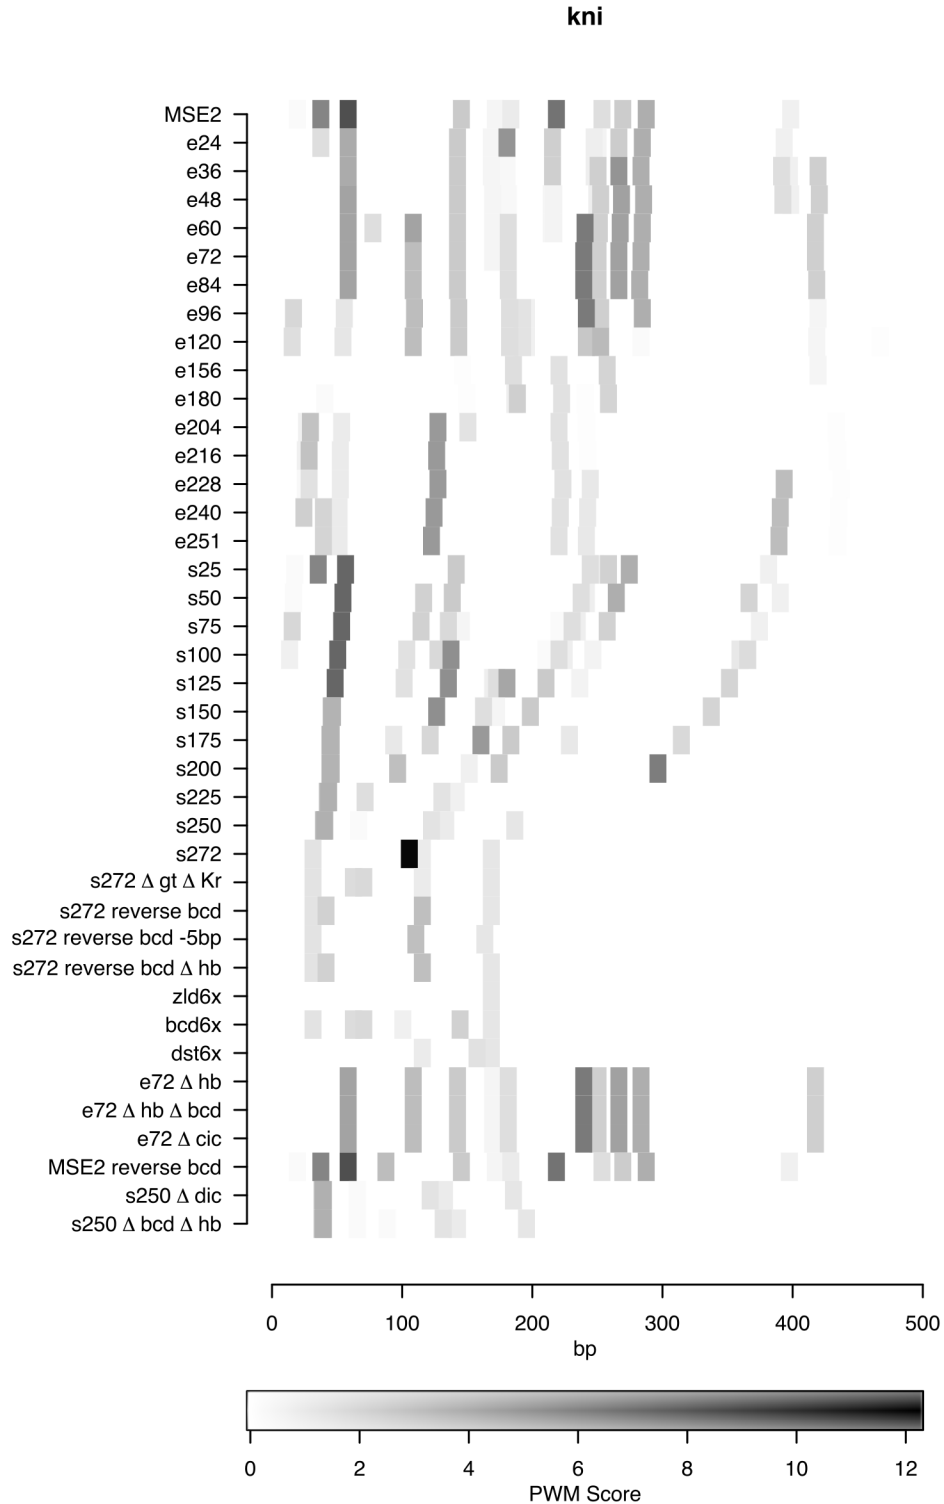

**Figure S12. Binding sites for Kni** For each sequence used in this work, we calculated the Kni PWM score at each position. Motif matches (score>0) are indicated by rectangles that are shaded according to the PWM score, with the legend under the *x*-axis.

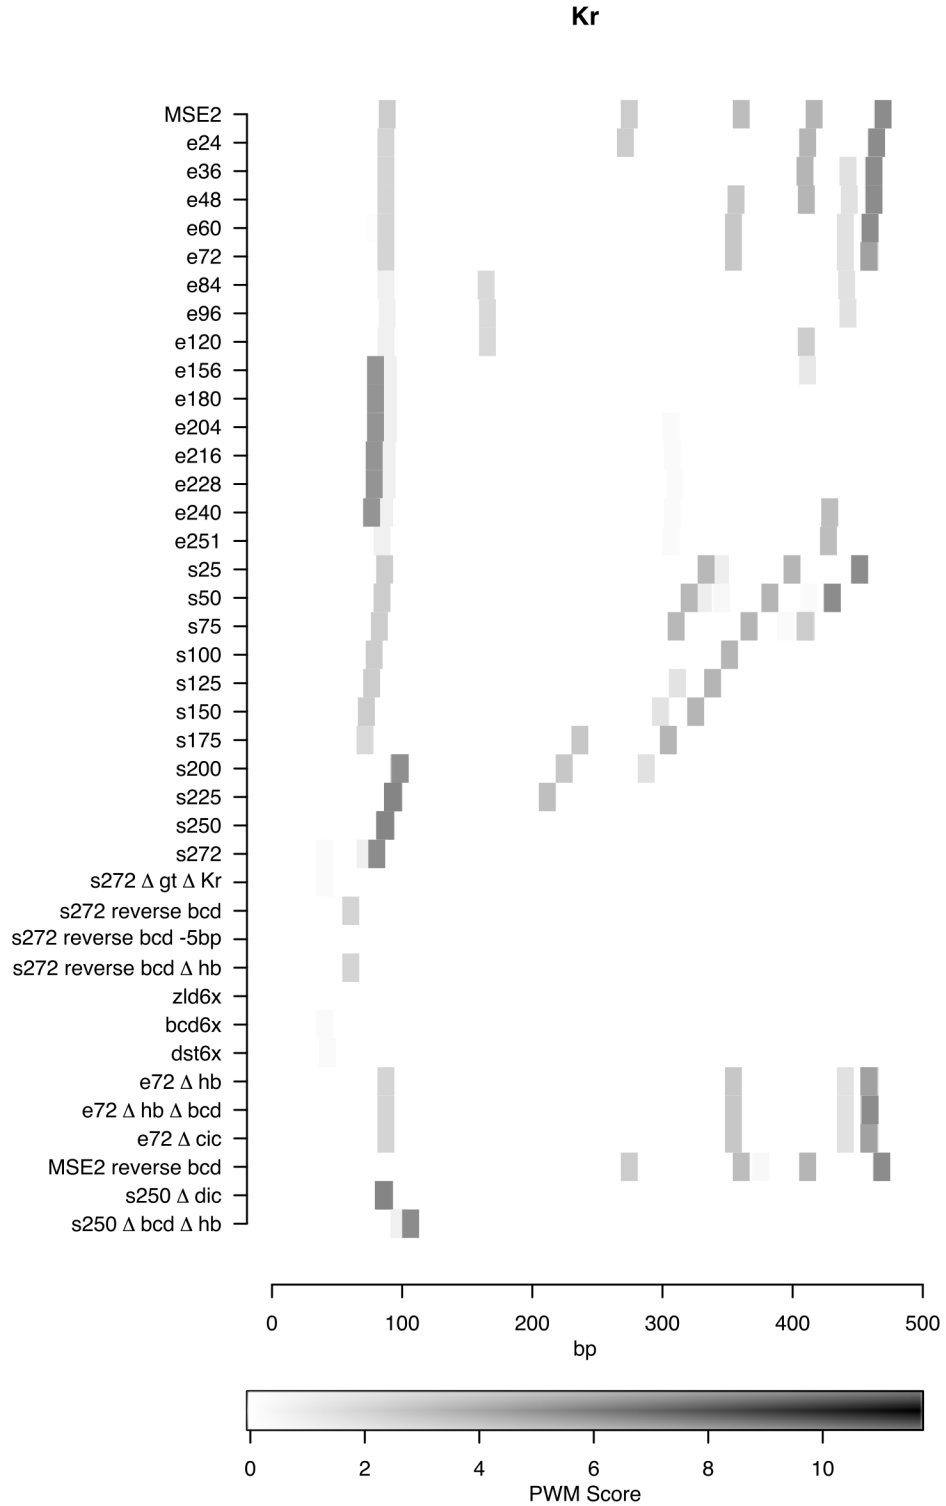

**Figure S13. Binding sites for Kr** For each sequence used in this work, we calculated the Kr PWM score at each position. Motif matches (score>0) are indicated by rectangles that are shaded according to the PWM score, with the legend under the *x*-axis.



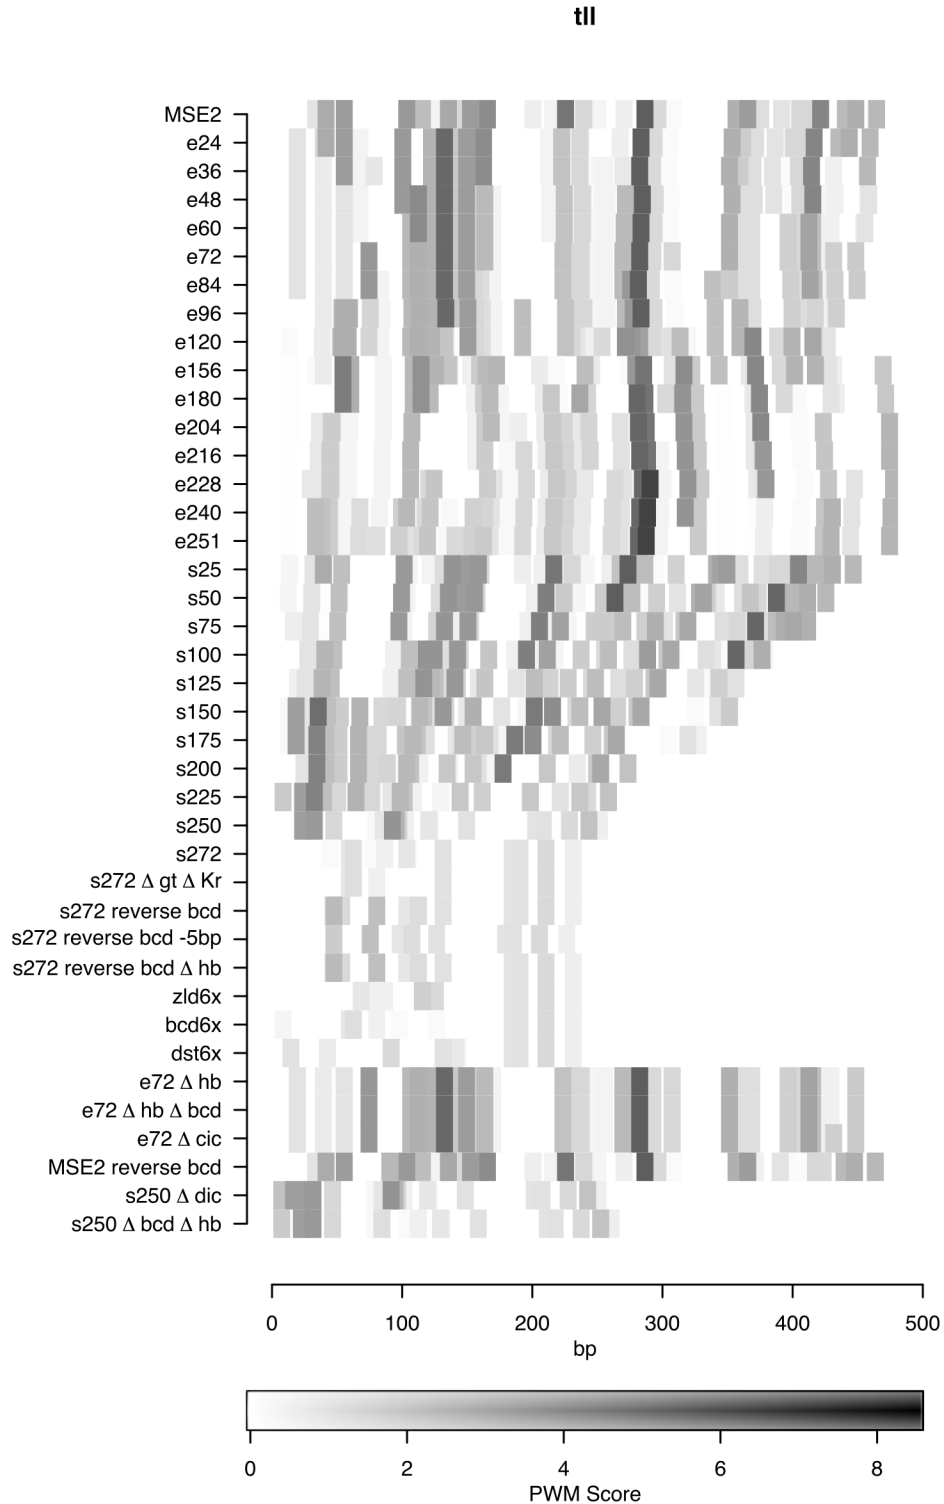

**Figure S14. Binding sites for Tll** For each sequence used in this work, we calculated the Tll PWM score at each position. Motif matches (score>0) are indicated by rectangles that are shaded according to the PWM score, with the legend under the *x*-axis.

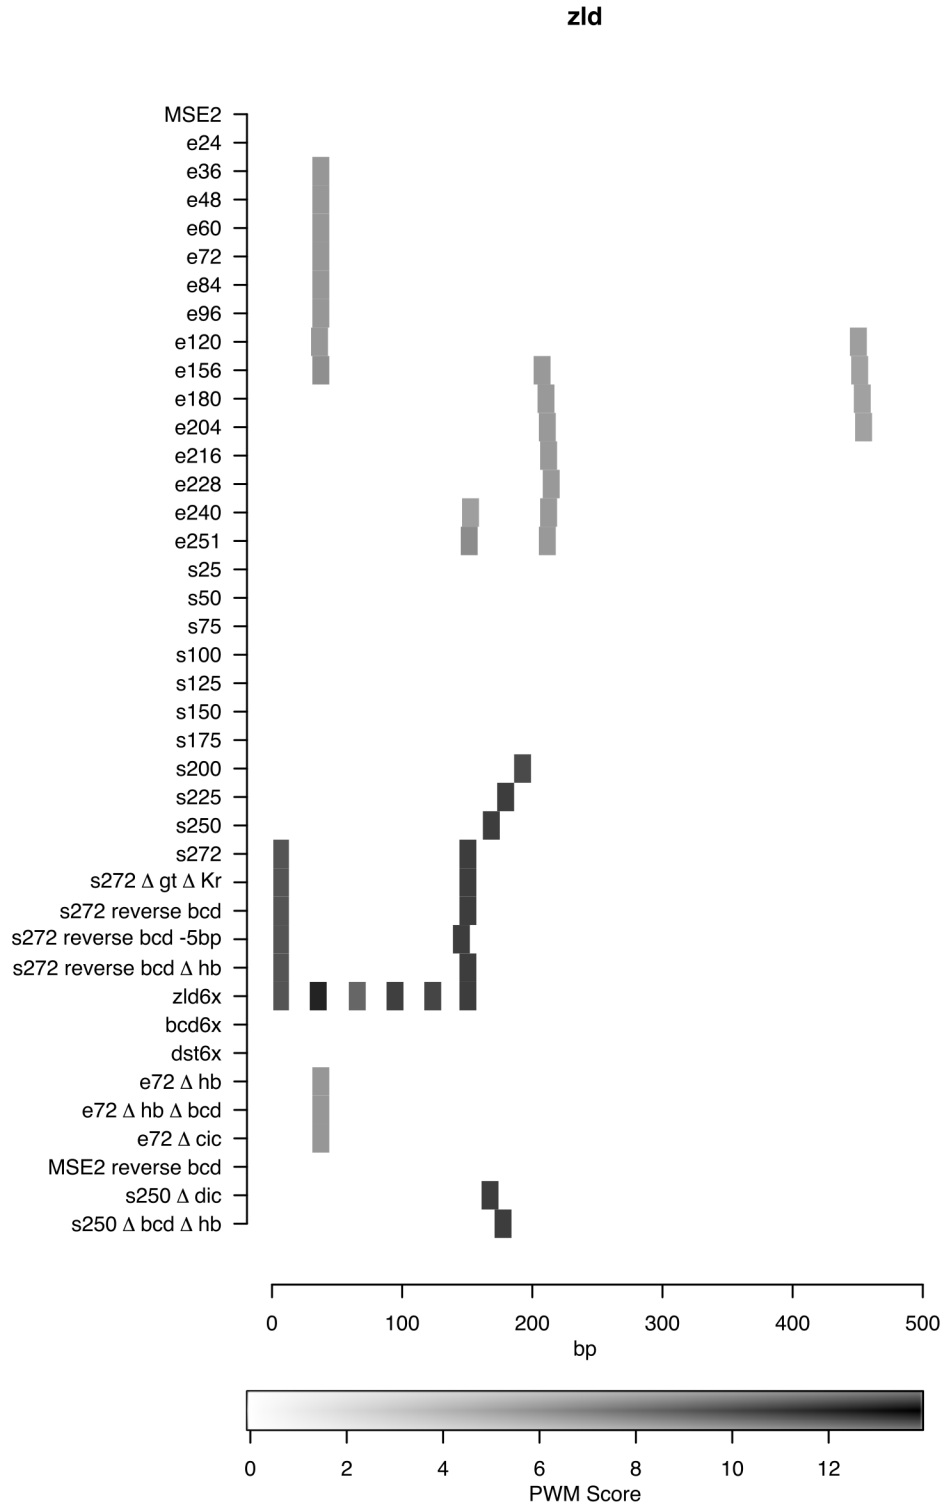

**Figure S15. Binding sites for Zld** For each sequence used in this work, we calculated the Zld PWM score at each position. Motif matches (score>0) are indicated by rectangles that are shaded according to the PWM score, with the legend under the *x*-axis.

| Parameter | TF        | Model      |            |            |               |               |               |            |
|-----------|-----------|------------|------------|------------|---------------|---------------|---------------|------------|
|           |           | 1          | 2          | 3          | 4             | 5             | 6             | 7          |
| $A$       | Bicoid    | 0.024022   | 0.037788   | 0.076132   | 0.002134      | 0.089843      | 0.063042      | 0.489863   |
| $\lambda$ | Bicoid    | 1.934457   | 4.992031   | 2.162269   | 0.591795      | 0.590000      | 0.590000      | 3.441042   |
| $E^A$     | Bicoid    | 2.677410   | 0.062923   | 0.000149   | 16.694600     | 0.000135      | 0.000118      | 0.000108   |
| $E^C$     | Bicoid    | 0.999878   | 0.217722   | 0.350294   | 0.683285      | 0.235757      | 0.194850      | 0.139848   |
| $D^C$     | Bicoid    | 150.660000 | 158.192000 | 150.630000 | 182.596000    | 186.889000    | 183.882000    | 184.813000 |
| $\omega$  | Bicoid    | 499.457000 | 189.210000 | 127.107000 | 34.655300     | 43.989600     | 499.673000    | 9.992570   |
| Threshold | Bicoid    | 1.710000   | 1.710000   | 1.710000   | -1.200000     | -1.000000     | -1.000000     | 1.710000   |
| PWM       | Bicoid    | Bcd_selex  | Bcd_selex  | Bcd_selex  | bicoid_mitomi | bicoid_mitomi | bicoid_mitomi | Bcd_selex  |
| $A$       | Caudal    | 0.071453   | 0.052367   | 0.026425   | 0.018378      | 0.003403      | 0.008447      | 0.014319   |
| $\lambda$ | Caudal    | 4.998159   | 4.976927   | 3.185278   | 9.990996      | 4.999857      | 4.999639      | 4.996867   |
| $E^A$     | Caudal    | 0.000103   | 0.000115   | 0.000107   | 0.000136      | 0.000111      | 0.000104      | 0.000153   |
| $E^C$     | Caudal    | 0.999899   | 0.337226   | 0.887749   | 0.999925      | 0.999946      | 0.999940      | 0.512709   |
| $D^C$     | Caudal    | 16.931600  | 70.875200  | 22.309700  | 11.549400     | 69.292800     | 36.338200     | 69.615400  |
| Threshold | Caudal    | 2.501270   | 3.061023   | 2.065076   | 2.992003      | 2.108353      | 2.163674      | 2.728832   |
| $A$       | Stat92E   | 3.990583   | 1.099451   | 3.999120   | 3.999022      | 3.999657      | 3.998975      | 3.999516   |
| $\lambda$ | Stat92E   | 0.894867   | 2.585787   | 0.696684   | 0.693574      | 0.743904      | 0.735156      | 1.309302   |
| $E^A$     | Stat92E   | 0.000193   | 0.000154   | 19.995300  | 19.996900     | 19.999800     | 19.999000     | 0.000392   |
| Threshold | Stat92E   | 4.038679   | 2.836359   | 3.631432   | 2.977216      | 3.589654      | 4.098801      | 3.890423   |
| $A$       | Dicheate  | 3.953880   | 3.893817   | 0.179983   | 0.051160      | 3.991435      | 0.271187      | 1.163608   |
| $\lambda$ | Dicheate  | 1.310409   | 1.983447   | 4.548029   | 2.484454      | 0.929774      | 4.992717      | 2.516001   |
| $E^A$     | Dicheate  | 0.000175   | 0.000139   | 0.453824   | 0.000812      | 0.282053      | 0.000156      | 0.000108   |
| Threshold | Dicheate  | 4.003251   | 4.794568   | 2.962805   | 3.813067      | 4.909050      | 4.384482      | 2.416283   |
| $A$       | Hunchback | 0.089845   | 2.724241   | 0.041525   | 0.046542      | 0.059710      | 0.054422      | 1.172800   |
| $\lambda$ | Hunchback | 4.735283   | 1.836818   | 4.999943   | 0.591793      | 4.554233      | 4.999490      | 1.839149   |
| $E^Q$     | Hunchback | 0.969302   | 0.999983   | 0.999964   | 0.999967      | 0.999998      | 0.999987      | 0.999985   |
| $E^A$     | Hunchback | 19.546500  | 20.417400  | 29.999000  | 18.683900     | 24.630300     | 27.349300     | 29.979000  |
| $E^D$     | Hunchback | 0.441831   | 0.323916   | 0.581803   | 0.976922      | 0.095546      | 0.000209      | 0.490470   |
| Threshold | Hunchback | 0.630000   | 0.630000   | 0.630000   | -3.250000     | 0.630000      | 0.630000      | 0.630000   |
| PWM       | Hunchback | Hb_selex   | Hb_selex   | Hb_selex   | Hb_mitomi     | Hb_selex      | Hb_selex      | Hb_selex   |
| $A$       | Zelda     | NA         | NA         | NA         | 0.066168      | NA            | NA            | 0.002172   |
| $\lambda$ | Zelda     | NA         | NA         | NA         | 9.999855      | NA            | NA            | 3.755900   |
| $E^A$     | Zelda     | NA         | NA         | NA         | 0.558206      | NA            | NA            | 19.982600  |
| Threshold | Zelda     | NA         | NA         | NA         | 1.487750      | NA            | NA            | -0.754056  |
| $A$       | Kruppel   | 3.997768   | 0.038668   | 2.952886   | 0.865115      | 0.025163      | 0.058992      | 0.055444   |
| $\lambda$ | Kruppel   | 0.888617   | 4.040318   | 0.980777   | 1.266060      | 4.997118      | 2.863341      | 4.999282   |
| $E^Q$     | Kruppel   | 0.999988   | 0.902770   | 0.999996   | 0.999938      | 0.999990      | 0.999966      | 0.999997   |
| $E^D$     | Kruppel   | 0.999654   | 0.999748   | 0.999654   | 0.261343      | 0.414812      | 0.724846      | 0.758756   |
| Threshold | Kruppel   | 0.335286   | 2.116363   | 0.072662   | 1.348795      | 0.445604      | 0.536644      | 0.409664   |
| $A$       | Knirps    | 0.208940   | 2.233074   | 0.272310   | 0.060819      | 0.267202      | 0.396735      | 0.094753   |
| $\lambda$ | Knirps    | 4.998806   | 2.487536   | 1.568829   | 3.879400      | 1.908455      | 1.441430      | 3.153326   |
| $E^Q$     | Knirps    | 0.168820   | 0.063714   | 0.999168   | 0.999906      | 0.999376      | 0.999826      | 0.999686   |
| $E^D$     | Knirps    | 0.000515   | 0.123624   | 0.999541   | 0.089845      | 0.378947      | 0.034038      | 0.958817   |
| Threshold | Knirps    | 4.321854   | 2.234361   | 4.856997   | 5.611598      | 4.105547      | 3.739100      | 2.262279   |
| $A$       | Giant     | 0.125367   | 2.530848   | 0.039886   | 0.110539      | 3.996551      | 0.054890      | 3.995412   |
| $\lambda$ | Giant     | 4.998344   | 1.713581   | 4.999174   | 2.321564      | 1.273039      | 4.999384      | 1.382071   |
| $E^Q$     | Giant     | 0.386106   | 0.723628   | 0.739607   | 0.795631      | 0.492502      | 0.426621      | 0.858064   |
| $E^D$     | Giant     | 0.974631   | 0.171351   | 0.999683   | 0.000246      | 0.999547      | 0.999945      | 0.171011   |
| Threshold | Giant     | 0.585501   | 0.591202   | 0.504367   | 2.611903      | 0.723453      | 0.646484      | 0.653197   |
| $A$       | Tailless  | 0.422458   | 0.023573   | 1.946981   | 0.013529      | 1.014708      | 0.282655      | 0.063704   |
| $\lambda$ | Tailless  | 1.304139   | 4.980396   | 0.962922   | 9.761793      | 1.132544      | 1.491165      | 2.710489   |
| $E^Q$     | Tailless  | 0.999524   | 0.999485   | 0.999960   | 0.000136      | 0.999794      | 0.998830      | 0.999869   |
| $E^D$     | Tailless  | 0.000607   | 0.000255   | 0.000155   | 0.000168      | 0.000241      | 0.000186      | 0.000167   |
| Threshold | Tailless  | 1.968527   | 1.977264   | 1.972201   | 2.506890      | 1.812958      | 1.969305      | 1.974659   |
| $\theta$  | NA        | 6.147710   | 6.085620   | 5.955810   | 7.478010      | 5.727320      | 5.731930      | 6.242990   |

Table S1. Continued on next page...

**Table S1.** Continued from previous page. The model parameters and PWMs that were used generate the sequences in this work are given. All parameters are as described in Kim et. al.[?] and models 1,2, and 3 are discussed in that work where they are called Model 01, Model 06, and Model 07 repectively. Models 5, 6, and 7 were trained as descibed in Kim et. al [? ]. Model 4 was trained as described in Martinez et. al [? ]. PWMs are specified for factors where the PWM chosen was different among fits.

## 1.2 Position Weight Matrices Used

```

> Bcd_selex
A | 83   74   108  48   5   381  379  4   0   5   72  61  65  68
C | 114  159  127  149  0   0   0   0  383  340  136  174  166  158
G | 106  72   114  11   0   1   4   4   0   2  132  60  52  49
T | 80   78   34   175  376  0   0   374  0   34  43  88  100  108

> cad_1hyb
A | 9   12  2   3   12  38  0   3   21  1
C | 9   6   3   0   0   0   0   0   0   8
G | 4   3   3   0   1   0   0   7   14  10
T | 11  16  29  34  24  0   38  27  0   1

> dst_selex
A | 0   1  2   1   0   5   3   0  24  28  27  5
C | 0   0  1  27  20  16  3   1   3   0  1  7
G | 0   1  0   1   6   8  22  27  1   1  0  6
T | 28  28  27  1   3   1   2   0   2   1  2  11

> dic_1hyb
A | 1   0  0   20  0   0   2   0   1   3   6
C | 7   25  17  0   0   0   0   0   2  10  1
G | 7   0  0   0   0   3  27  0   4   6   1
T | 13  3   1   9   28  26  0  28  22  9   21

> hb_selex
A | 53   1   0   1   0   0   0   280  31  20
C | 6   5   1   0   1   2   1   0   43  100
G | 224  3   0   0   0   0   0   2   78  109
T | 7   279  288  288  288  287  288  5  138  61

> Kr_selex
A | 17  187  158  0   1   0   8   0   2   44
C | 73  5   39  194  194  197  22  1   34  109
G | 6   0   0   0   0   0   6   0   1   15
T | 101 5   0   2   2   0  161  195  159  29

> kni_1hyb
A | 19  25  16  5   0  21  0  17  1   0  25  5
C | 0   0  0   9  4   0  0  0   3  26  0  12
G | 1   0  0   6  0   5  26  7  18  0  0  7
T | 3   0  10  5  21  0  0  1   4  0  0  2

> gt_selex
A | 85  11  776  8   82  0  1020  1105  15
C | 61  107  24  762  19  555  88  0  378
G | 18  359  275  64  996  0  0  0  85
T | 941 630  32  274  11  553  0  2  631

```

```

> tll_matrix
A | 11  1  1  5  1  11  1  0  0
C | 7  2  2  1  2  1  17  2  2
G | 0  2  1  0  15  5  0  1  2
T | 0  15 16  14  0  3  2  17  15

> zld_lhyb
A | 54  7  756  0  1  4  756  76
C | 0  749  1  0  0  0  5  75
G | 478  0  1  731  750  3  0  566
T | 229  5  3  30  10  754  0  44

> Bcd_mitomi
A | 0.4446859  1.024804  0.000000  1.308060  1.212380  0.0000000
C | 0.8241404  1.212753  0.901402  1.386241  0.819161  1.1815924
G | 0.0000000  0.000000  1.211622  1.455025  1.407177  1.1908577
T | 0.8472205  1.141426  1.261173  0.000000  0.000000  0.8257633

> Hb_mitomi
A | 0.2557999  1.8157733  2.896855  2.954505  3.928484  3.637427  1.759458  0.0000000
C | 0.6691087  0.8469678  2.268623  1.556663  4.230409  2.748917  3.135718  1.5068606
G | 0.0000000  2.5883169  2.128065  1.824146  3.205319  3.789288  2.927774  0.8407924
T | 0.2229569  0.0000000  0.000000  0.000000  0.000000  0.000000  0.000000  1.4966308

> cic_lhyb
A | 1  0  0  18  0  0  0  18
C | 10 11 18  0  0  0  10  0
G | 0  0  0  0  0  0  8  0
T | 6  7  0  0  18  18  0  0

```

### 1.3 Sequences

The sequences generated in this work are given below.

```

>MSE2
CCGGTACTGCATAACAATGGAACCCGAACCGTAACTGGGACAGATCGAAAAGCTGGCCTGGTTTCTCGCTGTGTGTGCCGTGTT
AATCCGTTTGCCATCAGCGAGATTATTAGTCAATTGCAGTTGCAGCGTTTCGCTTTTCGTCCTCGTTTCACTTTTCGAGTTAGACTTTAT
TGCAGCATCTTGAACAATCGTCGCAGTTTGGTAACACGCTGTGCCATACTTTCAATTTAGACGGAATCGAGGGACCCTGGACTATAAT
CGCACAACGAGACCCGGTTGCGAAGTCAGGGCATTCCGCCGATCTAGCCATCGCCATCTTCTCGGGCGTTTGTGTTGTTTGTGCT
GGGATTAGCCAAGGGCTTGACTTGGAAATCCAATCCCGATCCCTAGCCGATCCCAATCCCAATCCCAATCCCTTGTCTTTTCATTAG
AAAGTCATAAAAACACATAATAATGATGTCTGAAGGGATTAGGGG

>e24
CCGGTACTGAATACCAGTGGATTCCGAACCGTAAACAGGGACAGATCGAAAAGCTGGCCTGGTATCTGCTGTGTGTGCCGTGTT
AATCCGTTGCCACAGCGAGATTGTTAGTCACTTGCAGTTACAGTATTTTCGCTGTCTCGTCTCGTTTCACTTTTCGAGTTAGACTTTATT
GCAGCATCTAGAACAATCGTCGCAGTTTCGGTAACACGCTGTGCCATACTATCATTTAGACGGAATCGAGGGACCCTGGACCATAATC
GCACAACGAGACCCGGTTGCGAAGTCAGGGCATTCCGCCGATCTAGCCATCGCCATCTTCTCCGGGTGTTTGTGTTTGTGTTGCTG
GGATTAGCCAAGGGCTTGACTTGGAAATCCAATCCCGTCCCTAGCCGATCCCAATCCCAATCCCAATCCCTTGTCTTTTCATTAGAAA
GTCATAAAAACACATAATAATGATGTCTGAAGGGATTAGGGG

>e36
CCGGTACTGAATACCAGTGGATTCCGAACCGTAAACAGGTACAGATCGAAAAGCTGGCCTGGTATCTGCTGTGTGAGCCGTGTTA
ATCCGTTGCCACAGCGAGATTGTTAGTCACTTGCAGTTACAGTATTTTCGCTGTCTCGTCTCGTTTCACTTTTCGAGTTAGACTTTATTGC
AGCATCTATAACAATCGTCGCAGTTTCGGTAACACGCTGTGCCATACTATCATTTAGACGGAATCGAGGGACCCTGGACCATAGTCGC
ACAACGAGACCAGTTGCGAAGTCAGGGCATTCCGCCGATCTAGCCATCGCCATCTTCTCCGGGTGTTTTTGTGTTTGTGTTGCTGGGAT
TAGCCAAGGGCTTGACTTGGAAATCCAATCCCGTCCCTAGCCGATCCCGATCCCAATCCCAATCCCTTGTCTCTTCATTAGAAACTCA
TAAAAACCCATAATAATGATGTCTGAAGGGATTAGGGG

>e48
CCGGTACTGAATACCAGTGGATTCCGAACCGTAAACAGGTACAGATCGAAAAGCTGGTCTGGTATCTGCTGTGTGAGCCCTGTTA
ATCCGTTGCCACAGCGAGATTGTAAGTCACTTGCAGTTACAGTATTTTCGCTGTCTCGTCTCGTTTCACTTTTCGAGTCTAGACTTTAAT
GCAGCATCTATAACAATCGTCGCAGTTTCGGTAACACGCTGTGCCATACTATCATTTAGACGGAATCGAGGGACCCTGGACCATAGT

```

CGCACACGAGACCAATTGCGAAGTCAGGGCATTCCGCCGATCTAGCCATCGCCATCTTCTCCGCGTGTTTTATGATTGTTTGCTGG  
GATTAGCCAAGGGTGACTTGGAATCCAATCCCGTCCCTAGCCCGATCCCGATCCCAATCCCAATCCCTGTCTCTCATTGAAACT  
CATAAAAACCCATAATAATGATGCGAAGGGATTAGGGG

>e60

CCGGTACTGAATACCAGTGGATTCCGGACCGTAACAGGTACAGATCGAAAAGCTGGTCTGGTATCTGCTGTGTGACCCCTGTTA  
ATCCGTTGCCACAGCGAGAATGTAAGTCACTTGCAGTTACAGTATTTGCTGTGCTCCTCGTTTCACTTTGAGTCTAGACTTTAAT  
GCAGCATCTATACCAATCGTTCGAGTTCGGTAACACGCTGTGCCATATCTATCATTAGACGGAATCGAGGGCGCTGGACCATAGTC  
GCACAACGAGACCAATTGCGAAGTCAGGGCATTCCGCCGATCTAGCCATCGCCATCTTATCCGCGTGTTTTATGATTGTTTGGGGGA  
TTAGCCAAGGGTGACTTGGAATCCAATCCCGTCCATAGCCCGATCCCGACCTAATCCCAATCCCTAGTCTCTTCAATTTGAAACTCAT  
AAAAACCCATAATAATGATGCGAAGGGATTAGGGG

>e72

CCGGTACTGAATACCAGTGGATTCCGGACCGTAACAGGTACAGATCGAAAAGCTGGTCTGGTATCTGCTATGTGACCCCTGATA  
ATCCGTTGCCACAGCGAGAATGTAAGACACTTGCAGTTACAGTATTTGCTGTGCTCCTCGTTTCACTTTGAGTCTAGACTTTAAT  
GCAGCATCTATACCAATCGTTCGAGTTCGGTAACACGCTGTCCATATCTATCATTAGATGGAATCGAGGGCGCTGGACCATAGTCG  
CACAACGAGACCAATTGCGAAGTCAGGGCATTCCGCCGATCTAGCCATCGCTCATCTTATCCGCGTGTTTTATGAATGTTTGGGGGA  
TTAGCCAAGGGTGACTTGGAATCCAATCCCGTCCATAGCCCGATCCCGACCTAATCCCAATCCCTAGTCTCTTCAATTTGAAACTCAT  
ATAAACCCATAATACTGATGGGAAGGGATGAGGGG

>e84

CCGGTACTGAATACCAGTGGATTCCGGACCGTAACAGGTACAGATCGAAAAGCTGGTCTGGTATCTGCTATGTGACCCCTGAGG  
ATCGGTTGCCACAGCGAGAATGTAAGACACTTGCAGTTACAGTATTTGCTGTGCTCCTCGTTTCACTTTGAGTCTAGCCTTTAAT  
GCAGCATCTATACCAATCGTTCGAGTTCGGTAACACGCTGTCCATATCTATCATTAGATGGAATCGAGGGCGCTGGACCATAGTCG  
CACAACGAGACCAATTGCGAAGTCAGGGCATTCCGCCGATCTAGCCATCAGCTCATCTTATCCGCGTGTTTTATGAAAGTTTGGGGGA  
TTAGCCAATGGTGACTTGGAATCCAATCCCGTCCATAGTTCCCGATCCCGACCTAATCCCAACCCTAGTCTCTTCAATTTGAAACTCA  
TATAAACCCATAATACTGATGGGAAGGTGATGAGGGG

>e96

CCGGTACTGAATACCAGTGCATTCCGGACCGTAACAGGTACAGATCGAAAAGCTAGGTCTGGTATCTGCTATGCGACCCCTGAG  
GATGCGTTGCCACAGCGAGAATGTAAGACACTTGCAGTTACAGTATTTGCTGTGCTCCTCGTTTCACTTTGAGTCTAGCCTTTAA  
TGCAGCATCTATACCAATCTGTTCGAGTTCGGTAACACGCTGTCCATATCTATCATTAGATGGAATCGAGGGCGCTGGACCATAGT  
CGCACGACGAGACCAATTGCGAAGTCAGGGCATTCCGCCGATCTATCCATCAGCTCATCTTATCCGCGTGTTTTATGAAAGTTTGGCG  
GATTCGCCAATGGGACTTGGAATCCAATCCCGTCCATAGTTCCCGATCCCGACCTAATCCCAACCCTAGTCTCTTCAATTTGAAACTC  
ATATAAACCCATAATACTGATGGGACACTGATGAGGGG

>e120

CCGGTACTGAATACCAGTGCATTCCGGACCGTAACAGGTACAGATCGAAAAGCTAGGTCTGGTATCTGCTATGCGACCCCTGAGG  
ATCGGTTGCCACAGCGAGAATGTAAGACACTTGCAGTTACAGTATTTGCTGTGCTCCTCGTTTCACTTTGAGTCTAGCCTTTAA  
TGCAGCATCTATACCAATCTGTTCGAGTTCGGTAACACGCTGTCCATATCTATCATTAGATGGAATCGAGGGCGCTGGACCAGAGT  
CGCACGACGAGACAATTGCGAAGTTAGGGGATTCCGCCGAACATTTCCATCAGCTCACCTTATCCGCGTGTTTTATGAAAGTTTGGCG  
GATTCGCCGATGGGACTTGGAATCTAATCCCGTCCATCAGTTCCCGTTCGGACTAATCCCAACCCAGTCTCTTCAATTTGATACTCA  
TATATACCCATGATACCTGATGGGACACTCATGAGAGCG

>e156

CAGTACTGAATCCGAGTGCATTCCGGACCGTTACAGGTACAGCTCGATAAGCTAAGGTCTGGTATCTGCTATGCAACCCCTGA  
GGATGCGTTGCCACAGCGAGAATGTAAGACGACTTGCAGTTACAGTATTTGCTGTGCTCCTCGTTGCACTTTCAAGTCTAGCCTT  
GAATGCGAGCATCTATACCAATCTGTTCGACCCGTACCTTACACGTTGTCCATATCAATATCCGATGTGAATCGACCCGCGCTGTACCA  
GAGTCGCACGACAGAAAATTGCGAAGTTAAGGGAATCCGCCGAACATTTCCATCAGCTCACTTTATCCGCGTGTTTTATGAAAGTTTGC  
GGGATTCGCCGATGGGATTGGAATCTAATCCCGTCCATCAGTTCCCGTTCGGACTAATCCCAACCCAGTCTCTTCAATTTGATACTG  
ATATATACCCGTGATACCTGATGGGACACTCATGAGAGCG

>e180

CAGTACTGAATCCGAGTGCATTCTGGACCGTTACAAGTACAGCTCGATAAGCTAAGGTCTGGTATCTGCTATGCAACCCCTGA  
GGATGCGTTGCCACAGCGAGAATGTAAGACGACTTTCATGTCTACAGTATTTGCAACGGTCTCCTCGTTGCACTTTCAAGTCTAGC  
CTCGAATGCATGATCTATACCAATCTGTTCGACCCGTACCTTCAACGTTGTCCATATCAATATCCGCTGTGGATGACCCGCGCTGTACC  
AGAGTCCACGACAGAAAATCTAAGTTAAGGGAATCCGCCGACACATTTCCATCAGTCTCACTTTATCCGCGTGTTTTATGAAAGTA  
TGCGGGATTTCGCCGATGGGATTGGAATCTAATCCCGTCCATCAGTTCCCGTTCGGACTAATCCCAACACAGAATCTTCAATTTGATAC  
TGATATATACCCGTGATACCTGATGGGACACTCATGAGAGCG

>e204

CAGTCTGAATCCGAGTGCATTCTGGACCGATTACAAGTAAAGCTGATGATCTAAGGTATGGTATCTGCTATGCAACCCCTGA  
GGATGCGTTGCCACAGCGAGAATGTAAGACGAGCTTTCATGATCTACAGTATTTGCAACGGGCTCCTCGTTGCACTTTCAAGTCTAG  
CCTCGAATGCATGATCTATCCCAATCTGTTCGACCCGTACCTTCAACGTAGTTCAATATCAATATGCGCGTGTGGATGACCCGCGCTGA

CCAGAGGCCACGACAGAAAATCTAAGTTAAGGGAATCCGCCGACACACTTCCATCAGTCTCACTTTATCCGCGTGTTCATGAAAG  
TATGCGGGATTCCCGGATGGGATTGGAATCTAATCCCGTACATCAGTTCCCATTCTCGACTAATCCAACACAGAATCTTAATGTGAT  
ACCGATATATACCCGTGATACCTGATGGGACCCTCATGAGACGACG

>e216

CAGTGGTAATTCCGAGTGCATTCTGGACCGATTACAAGTAAAGCTGATGATCTAAGGTATGGTATCTGCTATGCAACCCCTGAG  
GATGCGTTGCACAGCGAGAATGTAAGACGAGCTTTCATGATCTACAGTATTTGAAACGGGCGTCCCTCAGTTGCACTTTCAAGTCCAG  
CCACGAATGTGATGATCAATCCCAATCTGTGACCCGTACCTTCAACGTAGTTCATATCAATATGCCGCTGTGGATGACCGCGCTGT  
ACCAGAGGCCACGACAGAAAATCTAAGTTAAGGGAATCCTCCGACACACTTCCATCAGTCTCACTTTATCCGCGTGTTCATGAAA  
GTATGCGGGATTCCCGGATGGGATTGGAATCTAATCCCGTACATCAGTTCCCATTCTCGACTAATCCAACACAGAATCTTAAGGTGA  
TACCGATATATACCCGTGATACCTGTGGGACCCTCATGAGACGACG

>e228

CAGTGGTAATTCCGAGTGCATTCTGGGCCGATTACAAGTAAAGCTGATGATCTAAGGTATGGTATCTGCTATGCAACCCCTGAG  
GATGCGTTGCACAGCGAGAATGTAAGACGAGCTTTCATGATCTACAGTATTTGAAACGGGCGTCCCTCAGTTGCGCTTTCAAGTCC  
AACCACGAATGTGATGAGCAATCCCAATCTGTGACCCGTACCTTCAACGTAGTTCATATCAATATGCCGCTGTGGATAACCGCGCC  
GTGCCAGAGGCCACGACAGAAAATCTAAGTTAAGGGAATCCTCCGACACACTTCCATCAGTCTCACTTTATCCGCGTGTTCATGA  
AAGTATGCGGGATTCCCGGATGGGATTGGAATCTAATCCCGTACATCAGTTCACCATTCTCGACTAATCCAACACAGAATCTTAAGG  
TGATACCGATATATGCCCGTGTACCTGTGGGACCCTCATGAGACGACG

>e240

CAGTGGTAATTCCGAGTGCATTCTGGGCAGATTAAGTAAAGCTGATGATCTAAGGTATGGTATCTGTATGCAACCCCTGAGGA  
TGCGTTGCACAGGAGAATGTAAGACGAGCTTTCATGATCTACAGTAAATTCGAAACGGGAGTTCCTCAGTTAGCGCTGTCAAGTCCAA  
CCACGAATGTGATGAGCAATCCCAATCTGTGACCCGTACCTTCAACGTAGTTCATATCAATATGCCGCTGTGGATAACCGCGCCGT  
GCCAGAGGCCACGACAGAAAATCTAAGTTAAGGGAATCCTCCGACACACTTCCATCAGTCTCACTTTATCCGCGTGTTCATGAAA  
GTATGCGGCATTCCCGGATGGGATTGGAACCTAACACCCGTACATCAGTTCACCATTCTCGACTAATCCAACACAGAATCTTAAGGGTG  
ATACCGATATATGCCCGTGTACCTGTGGGACCCTCATGAGACGACG

>e251

CAGTGGTAATTCCGAGTGCATTCTGGCAGATTAAGTAAAGCTGATGATCTAAGGTATGGTATCTGTATGCAACACCTAGGATG  
CGTTGCACAGGAGAATGCAAAACGAGCTTTCATGATCTACAGTAAATTCGAAACGGGAGATTCCCTCAGTTAGCGGTGTCAAGTCCAAC  
CACGAATGTGATGAGCAATCCCAATCTGTGACCCGTACCTTCAACGTAGTTCATATCAATATGCCGCTGTGGATAACCGCGCCGTG  
CCAGAGGCCACGACAGAAAATCTAAGTTAAGGGAATCCTCCGACACACTTCCAAACAGTACTCACTTTATCCGCGTGTTCATGAAA  
GTATGGGCATTCCCGGATGGGATTGGAACCTAACACCCGTACATCAGTTCACCATTCTCGACTAATCCAACACAGAATCTTAAGGGTGA  
TACCGATATATGCCCGTGTACCTGTGGGACCCTCATGAGACGACG

>s25

CCGGTACGCATACAATGGAACCCGAACCGTAACTGGGACAGATCGAAAAGCTGGCCCGGTTTCCCGCTGTGTGTGCCGTGTTAA  
TCCGTTTGCCATCAGCGAGATTATATCAATGCAGTTGCAGCGTTTCGCCCTTCGTCTCGTTTCACTTCGAGTTAGATTTATTCAGCA  
TCTTGAAAATCGTCGAGTTTGGTAACACGCTGTGCCTACTTTCATTTAGACGGAATCGAGGGACCCTGGACTATAATGCACACGAG  
ACCGGGTGAAGTCAGGGCATTCCGCCGAATAGCCATCGCCATCTTCTGCGGCGTTTGTGTTGTTTGGCAAGGGATTAGCCAAGGC  
TTGACTTGGAATCCAATCCCGATCCAGCCCGATCCCAATCCCAATCCCAATCCCTTGTCTTTTCATTAGAAGTCATAAAAACACAT  
AATAATGATGTGGAAGGGATTAGGGG

>s50

CCGTACGCATACAATGGAACCCGAACCGTAACTGGACAGATCGAAAAGCTGGCCCGGTTTCCCGCTGTGTGTGCCGTGTTAATC  
CGTTTGCCATCAGCGAGATTATATCAATGCATTGCAGCGTTTCGCCCTTCGTCTCGTTTCACTTCGAGTTAGATTTTTCACATCTTG  
AAAATCGTCGAGTTGGTAACACGCTGTGCCTACTTTCGTTTAGACGGAATCAGGGACCCTGGACTATAATGCACACGAGCCGGGTA  
AGTCAGGGCATTCCCGCGAATAGCCATCGCCACTTCGCGCGTTTGTGTTGTTGATTGCAAGGGATTAGCCAAGGCTTGATTGGAATCC  
ATCCCGATCCAGCCCGATCCGAATCCCAATCAATCCCTTGCCTTTCATTAGAAGTCATAAAAACACATTAATGATGTGGAAGGGATT  
AGGG

>s75

CCGTACGCAACAATGGAACCGGAACCGTAACTGGACAGATCGAAAAGCTGGCCCGGTTTCCCGCTGTGTGTGCCGTGTTAATCCG  
TTTGCCATCAGCGAGATTATATCAATGCATTGCAGCGTTTCCCTTCGTCTCATTTACTCGAGTTAGATTTTTCACATCTTGAAAAT  
CGTCGAGTTGGTAACACGCTGTGCCTACTTTCGTTTAGACGGAATCAGACCCTGGACTATAATGCACACGAGCCGGGTAAGTCAGG  
CCATTCCGCCGAATGCCTAGCCACTTCGCGCTTTGTTGTTGATTGCAAGGGATTAGCCGCGTTGATGATCCATCCCGATCCAGCC  
CGATCGAATCCCAATCAATCCCTTGCCTTTCATTAGAAGCTAAAACACATTAAGATGTGGAAGGGATTAGGG

>s100

CCTACGCAACATGGAACCGGAACCGTAACTGGACAGATCGAAAAGCTGGCCCGGTTTCCCGCTGTGTGTGCCGTGTTAATCCGTTTG  
CCATCAGCGATTATATCTGCATTGCAGCGTTCCCTTCGTCTCATTTGCTCGAGTTAGATTTTTCACATCTGAAAACGTCGAGTT  
GGTAACACGCTGTGCCTACTTTCGTTTAGACGGAATCAGACCCTGGACTATAATGCACACGAGCCGGGTAAGTCAGGGCATTCCGCCG

AATGCCTAGCCACTCGCGCTTGTGTTGACTGCAAGGAATTAGCCGGCTTGATGATCCATCCCGATCCCAGCCCGATCGAATCCAT  
CAATCCCTTGCCCTTCATTAGAGCTAAAAACACATAGTGTGAGGATAGG

>s125

CCTACGCACATGGAACGCGACCGTAACTGGACAGATCGAAAGCTGGCCCGGTTTCCCGCTGTTGTGCGTGTAATCCGTTTGCC  
ATCAGCGGATTATATCTGCATTGCAGCGTTCCTTAATCCTCATTGCTCGAGTTAGATTTTTCACATCTGAAAACGTCGAGTGGT  
ACACTGTGCTACTTTGTTTAGACGGAATAGACCCTGGACTAGAATGCACACGAGCCGGTAGTCAGGCCATTCCGCCGAATGCCTAG  
CCACTCGCGCTTGTGTTTACCAGCAAGGAATTAGCCGGCTTGATGATCATCCCATCCCAGCCGATCGAATCCATCAATCCCTTGCTT  
CAGTAGAGCTAAACACATGTGAGATAGG

>s150

CCTACGCACATGGAAGTGACCGTAACTGGACAGTGAAGCTGGCCCTATTTCCCGCTGTTGTGCGTGTAATCCGTTTGACAGCG  
GCTTATTATCTCATTGCAGCTTCCCTTAATCCTCATTGCTCGAGTTAGATTTTTTCACATCTGAAAACGTCGAGTGGTACACTGTGCAC  
TTTGTTTAGACGGAAGACCCTGGACTAGACTGCACACGAGCCAGGTAGTCTGGCCATTCCGCCGAATGCCTAGCCACTCCGCTTGT  
TGTTTGACCGCAAGGAATTAGCCGGCTTGATGATCATCCCATCCCAGCCGATCGGATCCATCAATCCCTTGCTCAGTAGAGCTAAAC  
ACATCGAATAGG

>s175

CCTACGCACATGGAAGTGACCGTAACTGGACGTCGAAGCTGGCCCTATTTCCCGCTGTTGTGCGTGTAATCCCTTGACAGCGGCT  
TATTATCCATTGCAGCTCCCTTAATCCTCATTGCTCGGTTGTTTTTCACATCTGAAAACGTCAGTGGACACTGCATTGTTTGACGGA  
AAGACCTGGACTAGACTGCACATGACCCAGGTAGTCTGGCCATTCCGCCGAATGCCTAGCACCCCTGTTGTTGACCGCAAGGAATT  
AGCCGGCTTGATGATCATCCATCCCAGCCGATCGGATCATCAATCCCTTGCACTAGAGCTAAACACTCGAATAGG

>s200

CCTACGCACATGGTAGTGACCGTAACTGGACGTCGAAGCTGGCCCTATTTCCCGCTGTTGTGCGTGTAATCCTGCAGCGGCTTA  
TTATCCTTGACCCCTTAATCCTCATTGCTGGTGTTTTTTCACATCTGAAAACGTCAGTGGACACGCACTTGTGTTGACGGAAGACCTGG  
ACTAGACTGCACATGAGCAGGTAGTCTGGCCATTCCGCCAATGCTAGCACCCCTGTTGTTAGACCGCAAGGAATTAGCCGGCTTGAT  
ATATCCATCCCAGCCGATGGGATAACAATCCCTGCAGTAGAGCAAACACTGAATG

>s225

CCTACGCCATGGTAGTGACCGTACTGACTGCGTGAAGCTGGCCCTAATTTCCCGCTGTTGTGCGTGTAATCCGCAGCGGCTTATTA  
TCCTCACCCCTTAATCCTCATTGCTGGTGTTTTTAATCTAAACTAGGGACACGCACTGTTTGCCGAAAGACTGGACTGACTGCA  
CTGAGCAGGTAGTCTGCCATTCCGCCAATGCTAGCACCCCTGTAGTTAGACCCCAAGAAATTAGCCGGTGATATATCCATCCAGCC  
GATGGGATACGATCCCTGGTAGAGCAAACACTGAATG

>s250

CCACGACCATGGTAGTGACCGTACTGACTGCGTGAAGCTGGCCCTAATTTCCCGCTGTTGTGCGGTAATCGCAGCGCTTATTATCCTCA  
CCCCTTAAACCTCATTGCTGGTGTTTTTATCAAACACTAGGGACACGCACTGTTTCCCGAAAGACTGACTGACTGACTGAGCAGGTA  
GTCTGGCCAGTCTCCAATGCTAGACCCCTGAGTTAGACCCCAAGAAATTGCGGTGATATATCATCCAGCCGATGGGATAGATCCC  
GGTAGAGAAGCACTGAATG

>s272

ACGCAGGTAGTACTGACTGACTGACTGACTGGCCCTAATCCCCCTGTTTGCCTAATCGCAGCCCTAATCCCCCTGAAACCCATT  
TGCTGGTTTTTTATCAAACACTAGGGACGCACTGTTTCCCGAAAGACTGACTGACTGACTGAGCAGGTAGTCTGGCCAGTCTCCAA  
TGCTAGACCCCTGAGTTAGACCCCAAGAAATTGCGGTGATATATCATCGCCGATGGGATAGATCCCGGTAGAGAAGCACTGAATG

>s272 Δgt ΔKr

ACGCAGGTAGTACTGACTGACTGACTGACTGGCCCTAATCCCCCTGTTTGCCTAATCGCAGCCCTAATGCCCCCTGAATACCAAT  
TGATGGTTTTTAGTCTAACCGTATAACGCACTGTTTCCCGAAAGACTGACTGACTGACTGAGCAGGTAGTCTGGCCAGTCTCCAA  
TGCTAGACCCCTGAGTTAGACCCCAAGAAATTGCGGTGATATATCATCGCCGATGGGATAGATCCCGGTAGAGAAGCACTGAATG

>s272 reverse bcd

ACGCAGGTAGTACTGACTGACTGACTGACTGGCCCTAATCCCCCAGTTTGTCTACTCGCAGGGGGGATTAGGGCCTGAAACCGAGT  
TGCTGGTTTTTTATCAAACACTAGGAAGCGCACTGTTTCCCGAAAGACTGACTGACTGACTGAGCAGGTAGTCTGGCCAGTCTCCAA  
TGCTAGACCCCTGAGTTAGACCCCAAGAAATTGCGGTGATATATCATCGCCGATGGGATAGATCCCGGTAGAGAAGCACTGAATG

>s272 reverse bcd -5bp

ACGCAGGTAGTACTGACTGACTGACTGACTGGCCCTAATCCCCCAGTTTGTCTACTCGCAGGGGGGATTAGGGCCTGAAACCGAGT  
GGTTTTTTATCAAACACTAGGAAGCGCACTGTTTCCCGAAAGACTGACTGACTGACTGAGCAGGTAGTCTGGCCAGTCTCCAAATGCT  
AGACCCCTGAGTTAGACCCCAAGAAATTGCGGTGATATATCATCGCCGATGGGATAGATCCCGGTAGAGAAGCACTGAATG

>s272 reverse bcd Δhb

ACGCAGGTAGTACTGACTGACTGACTGACTGGCCCTAATCCCCCAGTTTGTCTACTCGCAGGGGGGATTAGGGCCTGAAACCGAGT  
TGCTGGTCTGTATCAAACACTAGGAAGCGCACTGTTTCCCGAAAGACTGACTGACTGACTGAGCAGGTAGTCTGGCCAGTCTCCAA  
TGCTAGACCCCTGAGTTAGACCCCAAGAAATTGCGGTGATATATCATCGCCGATGGGATAGATCCCGGTAGAGAAGCACTGAATG

>zld6x



ACGCAGGTAGTACTGACTGACTGACTGACTGGCCGCAGGTAGCCCTGTTTCGCGTACTCGCTGCGGCATGTAGCCCTGAATACCAAT  
TGATCGGCAGGTAGCTAACCGTATAACGCACTCTTCGAGGTAGAGACTGACTGACTGACTGAGCAGGTAGTCTGGCCAGTCCCTCAA  
TGCTAGACCCCTGAGTTAGACCCCAAGAAATTTGCGGTGATATATCATCGCCGATGGGATAGATCCCGGTAGAGAAGCACTGAATG  
>bcd6x

CCGCTAAGCCCCCGGACTGACTGACTGACTGGCCCTAATCCCCCTGTTTCGCGTACTCGCAGCCCTAATGCCCCCTGAATACCAAT  
TCACCATAATCCGCCCCACCGTATAGGGAACCCCGAATCCGCCCCGGACTGACTGACCCACTAATCCGCCCCGCCAGTCCCTCCAAT  
GCTAGACCCCTGAGTTAGACCCCAAGAAATTTGCGGTGATATATCATCGCCGATGGGATAGATCCCGGTAGAGAAGCACTGAATG  
>dst6x

TTTCCCGGAAAGACTGACTGACTGACTGGTTTCCCGGAAACCTGTTTCGCGTACTCGCAGTTTCCCGGAAACCTGAATACCGAT  
TGATTTCCCGGAAACTAACCGTATAACGCACTGTTTCCCGGAAAGACTGACTGACTGACTTTTCCCGGAAACTGGCCAGTCCCTCAA  
TGCTAGACCCCTGAGTTAGACCCCAAGAAATTTGCGGTGATATATCATCGCCGATGGGATAGATCCCGGTAGAGAAGCACTGAATG  
>e72 Δhb

CCGCTACTGAATACCAGTGGATTCCGGACCGTAACAGGTACAGATCGAAAAGCTGGTCTGGTATCTGCTATGTGACCCCTGATA  
ATCCGTTGCCACAGCGAGAATGTAAGACACTTGCAGTTACAGTATTTTCGCTGTCGTCCTCGTTTCACTTTTCGAGTCTAGACTTTAAT  
GCAGCATCTATACCAATCGTCGCAGTTCGTTAACACGCTGTCCATATCTATCATTTAGATGGAATCGAGGGCGCTGGACCATAGTCG  
CACACGAGACCAATTGCGAAGTCAGGGCATTCCGCCGATCTAGCCATCGCTCATCTTATCCGCGTGTTTTATGAATGTTTGGCGGA  
TTAGCCAAGGGTGACTTGGAATCCAATCCCGTCCATAGCCCGATCCCGACCTAATCCCAATCCCTAGTCTCTTCATTTGAAACTCAT  
AAAAACCCATAATACTGATGGGAAGGGATGAGGGG

>e72 Δhb Δbcd

CCGCTACTGAATACCAGTGGATTCCGGACCGTAACAGGTACAGATCGAAAAGCTGGTCTGGTATCTGCTATGTGACCCCTGATA  
ATCCGTTGCCACAGCGAGAATGTAAGACACTTGCAGTTACAGTATTTTCGCTGTCGTCCTCGTTTCACTTTTCGAGTCTAGACTTTAAT  
GCAGCATCTATACCAATCGTCGCAGTTCGTTAACACGCTGTCCATATCTATCATTTAGATGGAATCGAGGGCGCTGGACCATAGTCG  
CACACGAGACCAATTGCGAAGTCAGGGCATTCCGCCGATCTAGCCATCGCTCATCTTATCCGCGTGTTTTATGAATGTTTGGCGGA  
TTAGCCAAGGGTGACTTGGAATCCAATCCCGTCCATAGCCCGATCCCGACCTAATCCCAATCCCTAGTCTCTTCATTTGAAACTCAT  
AAAAACCCATAATACTGATGGGAAGGGATTAGGGG

>e72 Δcic

CCGCTACTGAATACCAGTGGATTCCGGACCGTAACAGGTACAGATCGAAAAGCTGGTCTGGTATCTGCTATGTGACCCCTGATA  
ATCCGTTGCCACAGCGAGAATGTAAGACACTTGCAGTTACAGTATTTTCGCTGTCGTCCTCGTTTCACTTTTCGAGTCTAGACTTTAAT  
GCAGCATCTATACCAATCGTCGCAGTTCGTTAACACGCTGTCCATATCTATCATTTAGATGGAATCGAGGGCGCTGGACCATAGTCG  
CACACGAGACCAATTGCGAAGTCAGGGCATTCCGCCGATCTAGCCATCGCTCATCTTATCCGCGTGTTTTATGATTGTTTGGCGGA  
TTAGCCAAGGGTGACTTGGAATCCAATCCCGTCCATAGCCCGATCCCGACCTAATCCCAATCCCTAGTCTCTTCATTTGAAACTCAT  
ATAAACCCATAATACTGATGGGAAGGGATGAGGGG

>MSE2 reversed bcd

CCGCTACTGCATAACAATGGAACCCGAACCGTAACAGGTACAGATCGAAAAGCTGGCCTGGTTTCTCGCTGTGTGTGCCGTGTg  
gattaGTTTGGCCATCAGCGAGATTATTAGTCAATTGCAAGTTGCAGGTTTCGAGCGTTTCGCTTTTCGTCCTCGTTTCACTTTTCGAGT  
GCAGCATCTTGAACAATCGTCGCAGTTCGTTAACACGCTGTGCCATACTTTCATTTAGACGGAATCGAGGGACCCTGGACTATAATC  
GCACAACGAGACCGGGTTGCGAAGTCAGGGCATTCCGCCGATCTAGCCATCGCCATCTTCTGCGGGCGTTTGTGTTGTTGTTGCTG  
GGATTAGCCAAGGGCTTGAATCCATCCCGATCCCTAGCCCGATCCCAATCCCAcaaggattgggatTCCTTTTCATTAGAAAGTC  
ATAAAAACACATAATAATGATGTCGAAGGGATTAGGGG

>s250 Δdic

CCACGCCACGGAAGTGACCGTGACTGACTCGACTGGCCCTAATCCCCCTGTTGTGCGGTAATCGCAGCGCTTATTATCCTCAC  
CCCTAAACCTCAATTTGCTGGTGTTTTTATCAAAGTGGGACACGCACTGTTCCCGGAAAGACTGACTGACTGACTGAGCAGGTAG  
TCTGGCCAGTCCCTCAATGCTAGACCCCTGAGTTAGACCCCAAGAAATTTGCGGTGATATATCATCCAGCCGATGGGATAGATCCCG  
GTAGAGAAGCACTGAATG

>s250 Δbcd Δhb

CCACGCCATGGTAGTGACCGTGACTGACTCGACTGGCCCTAATCCCCCTGTTGTGCGGTAATCGCAGCGCTTATTATCCTCAC  
GCCCTAATCCCCCTGAAACCCATTTGCTGGTGTTTTTATCAAAGTGGGACACGCACTGTTCCCGGAAAGACTGACTGACTGACT  
GAGCAGGTAGTCTGGCCAGTCCCTCAATGCTAGACCCCTGAGTTAGACCCCAAGAAATTTGCGGTGATATATCATCCAGCCGATGGG  
ATAGATCCCGGTAGAGAAGCACTGAATG

>5' Extention Primer

TGGGTTTTATTAACCTACATACATACTAGAATTCGAGCTCGCCCGGGGATC

>3' Extention Primer

GTTGTTGACTGTGCGGCGGTCACAGCTCGAGTGTGCTGCTCTCAGCCACCCCGCGCCCTTTTATACCGCTGCGCTC
